1           **ZHX2 Promotes HIF1 $\alpha$  Oncogenic Signaling in Triple-Negative Breast Cancer**

2   Wentong Fang,<sup>1,2\*</sup> Chengheng Liao,<sup>3\*</sup> Rachel Shi,<sup>3</sup> Jeremy M. Simon,<sup>2,4,5</sup> Travis S.  
3   Ptacek,<sup>2,5</sup> Giada Zurlo,<sup>3</sup> Youqiong Ye,<sup>6,7</sup> Leng Han,<sup>7</sup> Cheng Fan,<sup>2</sup> Christopher Llynard  
4   Ortiz,<sup>8,9,10</sup> Hong-Rui Lin,<sup>8</sup> Ujjawal Manocha,<sup>2</sup> Weibo Luo,<sup>3</sup> William Y. Kim,<sup>2</sup> Lee-Wei Yang,  
5   <sup>8,9,11</sup> and Qing Zhang<sup>3\*</sup>

6

7   <sup>1</sup> Department of Pharmacy, The First Affiliated Hospital of Nanjing Medical University,  
8   Nanjing, Jiangsu 210029, China

9   <sup>2</sup> Lineberger Comprehensive Cancer Center, University of North Carolina School of  
10   Medicine, Chapel Hill, NC 27599, USA

11   <sup>3</sup> Department of Pathology, University of Texas Southwestern Medical Center, Dallas, TX  
12   75390, USA

13   <sup>4</sup> Department of Genetics, Neuroscience Center, University of North Carolina, Chapel Hill,  
14   NC 27599, USA

15   <sup>5</sup> UNC Neuroscience Center, Carolina Institute for Developmental Disabilities, University of  
16   North Carolina, Chapel Hill, NC 27599, USA

17   <sup>6</sup> Shanghai Institute of Immunology, Faculty of Basic Medicine, Shanghai Jiao Tong  
18   University School of Medicine, Shanghai, 200025, China

19   <sup>7</sup> Department of Biochemistry and Molecular Biology, The University of Texas Health  
20   Science Center at Houston McGovern Medical School, Houston, TX, 77030, USA

21   <sup>8</sup> Institute of Bioinformatics and Structural Biology, National Tsing Hua University, Hsinchu  
22   300, Taiwan

23 <sup>9</sup> Chemical Biology and Molecular Biophysics Program, Taiwan International Graduate

24 Program, Institute of Chemistry, Academia Sinica, Taipei 115, Taiwan

25 <sup>10</sup> Department of Chemistry, National Tsing-Hua University, Hsinchu 30013, Taiwan

26 <sup>11</sup> Physics Division, National Center for Theoretical Sciences, Hsinchu 30013, Taiwan

27

28 \*: These authors contribute equally to this work

29 Corresponding author (Q.Z): [Qing.Zhang@UTSouthwestern.edu](mailto:Qing.Zhang@UTSouthwestern.edu)

30

31

32 **Abstract**

33 Triple-negative breast cancer (TNBC) is an aggressive and highly lethal disease, which  
34 warrants the critical need to identify new therapeutic targets. We show that Zinc Fingers And  
35 Homeoboxes 2 (ZHX2) is amplified or overexpressed in TNBC cell lines and patients.  
36 Functionally, depletion of ZHX2 inhibited TNBC cell growth and invasion in vitro, orthotopic  
37 tumor growth and spontaneous lung metastasis in vivo. Mechanistically, ZHX2 bound with  
38 hypoxia inducible factor (HIF) family members and positively regulated HIF1 $\alpha$  activity in  
39 TNBC. Integrated CHIP-Seq and gene expression profiling demonstrated that ZHX2 co-  
40 occupied with HIF1 $\alpha$  on transcriptionally active promoters marked by H3K4me3 and  
41 H3K27ac, thereby promoting gene expression. Furthermore, multiple residues (R491, R581  
42 and R674) on ZHX2 are important in regulating its phenotype, which correspond with their  
43 roles on controlling HIF1 $\alpha$  activity in TNBC cells. These studies establish that ZHX2  
44 activates oncogenic HIF1 $\alpha$  signaling, therefore serving as a potential therapeutic target for  
45 TNBC.

46

47 **Key words:** ZHX2, TNBC, HIF1 $\alpha$ , VHL

48

49

50

51

52

53

54

55

## 56 **Introduction**

57 Triple-negative breast cancer (TNBC) accounts for 15-20% of all breast cancer (Anders &  
58 Carey, 2009). TNBC is associated with a more aggressive clinical history, a higher likelihood  
59 of distant metastasis, shorter survival and a higher mortality rate compared to other  
60 subtypes of breast cancer (Anders & Carey, 2009). In addition, recent studies illustrate high  
61 rates of brain metastasis in TNBC that is associated with poor survival (Heitz *et al*, 2009; Lin  
62 *et al*, 2008; Niwinska *et al*, 2010). Since TNBCs do not express estrogen receptor (ER),  
63 progesterone receptor (PR) or human epidermal growth factor receptor 2 (HER2), treatment  
64 options have historically been limited to chemotherapy (Masui *et al*, 2013), which has  
65 significant toxicity and a suboptimal impact on the five-year relapse rate. Therefore, it is  
66 critical to identify novel therapeutic targets in TNBC.

67 The Zinc-fingers and homeoboxes (ZHX) family includes ZHX1, 2 and 3. ZHX2 is  
68 located on 8q24.13 and contains two zinc finger domains and five homeodomains (HDs)  
69 (Kawata *et al*, 2003). In addition, between amino acids 408-488, it contains a proline rich  
70 region (PRR). ZHX2 can form homodimers or can hetero-dimerize with the other two family  
71 members ZHX1 or ZHX3 (Kawata *et al.*, 2003). Originally, ZHX2 was found to be a key  
72 transcriptional repressor for the alpha-fetoprotein regulator 1 (*Afr1*) (Perincheri *et al*, 2005),  
73 which is an important oncogene in liver cancer. From this perspective, ZHX2 was identified  
74 and reported to function as a transcriptional repressor (Kawata *et al.*, 2003), where fusion of  
75 ZHX2 with a GAL4-DNA binding domain repressed transcription of a GAL4-dependent  
76 luciferase reporter. Additionally, ZHX2 was reported to have tumor suppressor activity in  
77 hepatocellular carcinoma (HCC), by repressing cyclin A, E and multidrug resistance 1  
78 (MDR1) expression (Ma *et al*, 2015; Yue *et al*, 2012). ZHX2 was also indicated to be a  
79 tumor suppressor in Hodgkin lymphoma or myeloma although there is no direct

80 experimental evidence supporting this hypothesis (Armellini *et al*, 2008; Nagel *et al*, 2012;  
81 Nagel *et al*, 2011).

82 However, accumulating evidence suggests that ZHX2 may contribute to cancer  
83 pathology in other contexts. Tissue microarray and clinicopathological analysis show that  
84 ZHX2 protein expression in metastatic HCC is twice as high as in the primary lesions,  
85 indicating that ZHX2 expression is associated with metastasis in HCC (Hu *et al*, 2007). In  
86 addition, our recent findings through genome-wide screening identify that ZHX2 is a  
87 substrate of von Hippel Lindau (gene name *VHL*, protein name pVHL) protein, accumulates  
88 in kidney cancer, and promotes oncogenic signaling by at least partially activating NF- $\kappa$ B  
89 signaling in clear cell renal cell carcinoma (ccRCC) (Zhang *et al*, 2018). These pieces of  
90 evidence suggest that ZHX2 acts as a tumor suppressor or oncogene in a context-  
91 dependent manner. It is also important to point out that ZHX2 is located on 8q24, a genomic  
92 region that is frequently amplified in various cancers including breast cancer (Guan *et al*,  
93 2007). More importantly, the role of ZHX2 in other cancers, such as in TNBC, remains  
94 largely unknown.

95 Tumor hypoxia is a characteristic of most solid tumors. Hypoxic cells are known to  
96 confer radio- or chemotherapeutic resistance, and therefore are hypothesized to undergo  
97 positive selection during cancer development (Brown & Wilson, 2004; Gray *et al*, 1953). The  
98 key proteins mediating oxygen sensing in these cells involve two classes of proteins: (1)  
99 upstream oxygen sensors, namely the prolyl hydroxylases EglN1-3, responsible for the  
100 hydroxylation of various substrates, such as hypoxia inducible factor (HIF), FOXO3a, ADSL,  
101 SFMBT1 and TBK1 (Hu *et al*, 2020; Liu *et al*, 2020; Semenza, 2012; Zheng *et al*, 2014;  
102 Zurlo *et al*, 2019); (2) the downstream VHL E3 ligase complex. For example, EglN family  
103 members (EglN1, primarily *in vivo*) hydroxylate HIF1 $\alpha$  on proline 402 and 564 positions,  
104 which lead to pVHL binding and HIF1 $\alpha$  ubiquitination and degradation (Appelhoff *et al*,

105 2004; Ivan *et al*, 2001; Jaakkola *et al*, 2001). HIF1 $\alpha$  has been well established to be an  
106 important oncogene in multiple cancers, including breast cancer (Briggs *et al*, 2016;  
107 Semenza, 2010). Tumor hypoxia or pVHL loss will lead to the accumulation of HIF1 $\alpha$ . As a  
108 result of the accumulation and translocation of HIF $\alpha$  factors into the nucleus, HIF1 $\alpha$   
109 dimerizes with a constitutively expressed HIF1 $\beta$  subunit (also called ARNT) and  
110 transactivates genes that have hypoxia response elements (NCGTG) in promoters or  
111 enhancer regions. HIF1-transactivated genes include those involved in angiogenesis (e.g.  
112 *VEGF*), glycolysis and glucose transport (e.g. *GLUT1*), and erythropoiesis (e.g. *EPO*)  
113 (Semenza, 2012). Besides tumor hypoxia or pVHL loss, other potential regulators of HIF1 $\alpha$   
114 may exist, which remains to be investigated.

115 In our current study, we investigated the role of ZHX2 as a new oncogene in TNBC,  
116 where it activates HIF1 $\alpha$  signaling. In addition, we also provide some evidence for critical  
117 residues on ZHX2 that binds with DNA, which contributes to TNBC tumorigenicity.

118

## 119 **Results**

### 120 **ZHX2 is Amplified in TNBC and is Potentially Regulated by pVHL**

121 *ZHX2* is located on 8q24, where *c-Myc* resides. Analysis of copy number across different  
122 cancer types from The Cancer Genome Atlas (TCGA) showed that *ZHX2* is amplified in  
123 various cancers, including ovarian cancer (~40%) and breast cancer (~15%) (Figure 1A).  
124 Importantly, *ZHX2* and *c-Myc* share co-amplification in most cancer types observed (Figure  
125 1B). Interestingly, *ZHX2* is not amplified in ccRCC (Referred as KIRC in Figure 1A, B),  
126 where it is regulated mainly post-transcriptionally by pVHL loss in this cancer (Zhang *et al.*,  
127 2018). Detailed analyses of several breast cancer patient datasets also revealed that TNBC  
128 had the highest ZHX2 amplification rate in all breast cancer subtypes (Figure 1C; Table

129 Supplement 1). Next, we performed correlation studies to examine the copy number gain of  
130 *ZHX2* and its expression in TCGA (Cancer Genome Atlas, 2012) and METABRIC datasets  
131 (Curtis *et al*, 2012a) (Figure 1D). We found a significant correlation between copy number  
132 and gene expression (Figure 1D), suggesting that *ZHX2* amplification may be at least  
133 partially responsible for its overexpression in breast cancer. We further explored the effect  
134 of *ZHX2* expression on breast cancer patient survival. *ZHX2* overexpression (Affymetrix  
135 probe 236169\_at) correlates with worse survival in TNBC but not in other breast cancer  
136 subtypes (Figure 1-figure supplement 1A). We obtained a panel of breast cancer cell lines  
137 as well as two immortalized normal breast epithelial cell lines, HMLE and MCF-10A.  
138 Interestingly, all breast cancer cell lines displayed relatively higher *ZHX2* protein levels  
139 compared to HMLE or MCF-10A (Figure 1E). We also obtained 10 pairs of TNBC patient  
140 tumors and paired normal tissue. Consistently, *ZHX2* was upregulated in the majority of  
141 tumors compared to normal (7 out of 10) (Figure 1F).

142 Our previous research established an oncogenic role of *ZHX2* in ccRCC as a pVHL  
143 substrate (Zhang *et al.*, 2018). However, the role of *ZHX2* in other cancers remains largely  
144 unclear. In addition, it is unclear whether *ZHX2* may also act as a pVHL target in breast  
145 cancer. Since TNBC had the highest *ZHX2* amplification rate in all breast cancer subtypes  
146 (Figure 1C; Table supplement 1), we decided to focus on TNBC for this current study. To  
147 this purpose, we first examined the relationship between the expression of *ZHX2* and pVHL  
148 in several TNBC cell lines (MDA-MB-231, MDA-MB-436, MDA-MB-468, HCC3153 and  
149 HCC70) as well as two normal breast epithelial cell lines, HMLE and MCF-10A.  
150 Interestingly, all TNBC cell lines displayed relatively lower pVHL protein levels  
151 corresponding with higher *ZHX2* protein level when compared to normal breast cells (Figure  
152 1-figure supplement 1B). Our co-immunoprecipitation (Co-IP) experiments showed that  
153 *ZHX2* interacts with pVHL in two representative TNBC cell lines (Figure 1G; Figure 1-figure

154 supplement 1C). Next, we aimed to examine whether pVHL can promote the degradation of  
155 ZHX2, therefore decreasing ZHX2 protein levels in these cells. First, we overexpressed HA-  
156 VHL in two different TNBC cell lines and found that pVHL overexpression leads to  
157 decreased ZHX2 protein levels (Figure 1H; Figure 1-figure supplement 1D). Conversely, we  
158 also deleted pVHL expression by three independent sgRNAs (#1, 2, 8) in these two cell  
159 lines and found that pVHL depletion led to upregulation of ZHX2 protein (Figure 1I and J).  
160 Our previous research showed that ZHX2 regulation by pVHL potentially depends on ZHX2  
161 prolyl hydroxylation (Zhang *et al.*, 2018). We treated these two cell lines with hypoxia, the  
162 pan-prolyl hydroxylase inhibitor DMOG, or the proteasomal inhibitor MG132 and found that  
163 ZHX2 was upregulated by these inhibitors (Figure 1K and L), further strengthening the  
164 conclusion that ZHX2 is regulated by pVHL for protein stability through potential prolyl  
165 hydroxylation in breast cancer. In addition, we obtained 10 additional pairs of TNBC tumors  
166 and paired normal tissue to analyze ZHX2 and pVHL protein levels. In accordance with the  
167 cell line data, we found that ZHX2 was upregulated in most of tumor tissues compared to  
168 normal, coinciding with decreased pVHL protein levels in respective tumor tissues (Figure  
169 1M). Our data suggest that ZHX2 may be regulated by pVHL and play an important role in  
170 TNBC.

171

## 172 **ZHX2 is Essential for TNBC Cell Proliferation and Invasion**

173 Next, we examined the potential role of ZHX2 in TNBC cell proliferation and invasion. First,  
174 we obtained two previously validated ZHX2 shRNAs (sh43, sh45) (Zhang *et al.*, 2018) and  
175 these shRNAs led to efficient ZHX2 protein (Figure 2A) and mRNA (Figure 2B)  
176 downregulation in both MDA-MB-231 and MDA-MB-468 cells. Next, we found that ZHX2  
177 depletion led to decreased cell proliferation in both cell lines as a function of time, 2-D  
178 colony formation as well as 3-D soft agar growth (Figure 2C-F). One important contributor



179 for the poor prognosis in TNBC is the aggressively invasive nature of this subtype.  
180 Therefore, we also used the Boyden chamber assay to examine the effect of ZHX2 on cell  
181 invasion in TNBC cells. Consistent with the results above, ZHX2 depletion led to decreased  
182 cell invasion in several different TNBC cell lines (Figure 2G and H). We also showed that  
183 ZHX2 shRNA induced phenotypes in TNBC cells could be completely rescued by shRNA-  
184 resistant ZHX2 (Figure 2I-N; Figure 2-figure supplement 2A-G), suggesting that these  
185 phenotypes were due to on-target depletion of ZHX2 by shRNAs.

186

### 187 **ZHX2 is Important for TNBC Cell Proliferation *in Vivo***

188 Next, to examine the ability of ZHX2 to maintain TNBC tumor growth *in vitro* and *in vivo*, we  
189 first infected two TNBC cell lines with doxycycline inducible ZHX2 shRNAs (Teton sh43,  
190 sh45). Upon doxycycline addition, we achieved efficient depletion of ZHX2 protein levels,  
191 corresponding to decreased ZHX2 mRNA levels (Figure 3A; Figure 3-figure supplement 3A  
192 and B) in the cells. Next, MTS assays showed that ZHX2 depletion upon doxycycline  
193 addition led to decreased TNBC cell proliferation, 2-D growth, 3-D anchorage independent  
194 growth (Figure 3B-E; Figure 3-figure supplement 3C-F). Next, we expressed firefly  
195 luciferase in the doxycycline-inducible ZHX2 shRNA (sh43 or sh45) or control shRNA cells  
196 before injecting these cells orthotopically into the 4<sup>th</sup> mammary fat pads of NoD SCID  
197 Gamma (NSG)-deficient mice. We performed weekly bioluminescence imaging to ensure  
198 the successful implantation and growth of TNBC tumor cells. After 12 days post-implantation  
199 when palpable tumors were formed, we fed these mice doxycycline chow. We found that  
200 ZHX2 depletion by both hairpins significantly decreased tumor growth overtime. Upon  
201 necropsy, ZHX2 shRNA-infected TNBC cells displayed reduced tumor burden retrieved from  
202 tumor-bearing mice compared to control mice (Figure 3F and G). We also performed a  
203 western blot for tumors extracted from the mammary fat pad and found decreased ZHX2

204 protein levels in ZHX2 shRNA-infected groups (Figure 3H), arguing that anti-tumor effect in  
205 these groups may result from efficient ZHX2 knockdown in these TNBC cells. In addition,  
206 we also measured spontaneous lung metastasis *ex vivo* upon necropsy and found that  
207 ZHX2 depletion led to significantly decreased lung metastasis in TNBC (Figure 3I and J).  
208 Lastly, we also injected ZHX2 Teton sh45-infected cells into the mammary fat pad, followed  
209 by regular chow or doxycycline chow. Consistent with results above, doxycycline chow led  
210 to significantly decreased TNBC tumor growth over time (Figure 3K and L) corresponding  
211 with lower ZHX2 protein levels in these tumors (Figure 3M). Taken together, our data  
212 strongly indicate that ZHX2 is important for TNBC tumorigenesis *in vivo*.

213

#### 214 **ZHX2 Regulates HIF Signaling in TNBC**

215 Next, we aimed to determine the molecular mechanism by which ZHX2 contributes to  
216 TNBC. For this purpose, we performed RNA-seq analyses in MDA-MB-231 cells with two  
217 independent ZHX2 shRNAs (sh43, sh45) and found that two individual shRNAs  
218 concordantly altered gene expression patterns (Figure 4A). Pathway enrichment as well as  
219 gene set enrichment analyses (GSEA) revealed that genes differentially expressed following  
220 ZHX2 depletion were enriched for members of the hypoxia pathway (Figure. 4B; Figure 4-  
221 figure supplement 4A-C). Overall, there were 7,690 genes differentially expressed following  
222 ZHX2 silencing by shRNA, and 1,849 (24%) of these genes overlapped with genes  
223 differentially expressed in a previously published HIF double knockout (HIF1 $\alpha$  and HIF2 $\alpha$   
224 double knockout, HIF DKO) model (Figure 4C) (Chen *et al*, 2018). Since ZHX2 was similarly  
225 reported as an oncogene in ccRCC and preferentially upregulated the transcription of  
226 downstream genes (Zhang *et al.*, 2018), we focused on the 3,969 ZHX2 positively regulated  
227 genes (downregulated following ZHX2 silencing by shRNA) as these genes may be more  
228 relevant in breast cancer. Of these, 678 genes (17%) overlapped with downregulated genes

229 in the HIF DKO RNA-seq (Figure 4B-D), representing a significant association (adj.  $p = 1.07$   
230  $\times 10^{-69}$ ). This data strengthens the potential functional link between HIF and ZHX2. The  
231 genes positively regulated by ZHX2 were also enriched for other potentially relevant  
232 biological pathways such as cell adhesion and cell morphogenesis (Figure 4B). Next, we  
233 examined whether ZHX2 depletion affected some of the canonical HIF target genes. Based  
234 on our ZHX2 RNA-seq and GSEA results (Figure 4-figure supplement 4C), we chose a few  
235 representative HIF target genes and examined their expression levels by qRT-PCR in MDA-  
236 MB-231 cells infected with control or ZHX2 shRNA under either normoxia or hypoxia. As  
237 expected, hypoxia treatment increased the expression of HIF target genes, and this effect  
238 was ameliorated by ZHX2 depletion (Figure 4-figure supplement 4D), suggesting that ZHX2  
239 affects HIF activity and regulates HIF target gene expression in TNBC. Consistently, HIF  
240 reporter assay found that ZHX2 depletion led to decreased HIF reporter activity either under  
241 normoxia or hypoxia (Figure 4-figure supplement 4E).

242         Next, to gain further insight on how ZHX2 affect the HIF signaling. Consider a well  
243 characterization on HIF1 function in TNBC tumorigenesis by previous studies (Bos *et al*,  
244 2001; Briggs *et al.*, 2016). We first performed Co-IP experiments and showed that ZHX2  
245 bound with HIF1 $\alpha$  and HIF1 $\beta$  exogenously as well as endogenously (Figure 4E-G). In  
246 addition, ZHX2 knockdown led to decreased HIF1 $\alpha$  protein levels in two TNBC cell lines  
247 under hypoxia condition (Figure 4H and I). Conversely, ZHX2 overexpression led to  
248 increased HIF1 $\alpha$  protein levels under normoxia (Figure 4J). However, these ZHX2 loss-of-  
249 function or gain-of-function manipulations did not grossly change HIF2 $\alpha$  protein level (Figure  
250 4I and J). Co-IP experiments showed that ZHX2 could not bind with HIF2 $\alpha$  (Figure 4K).  
251 These results suggest that ZHX2 regulates the hypoxia signaling mainly through HIF1 $\alpha$ .  
252 Interestingly, qRT-PCR showed that ZHX2 overexpression did not increase HIF1 $\alpha$  mRNA  
253 level (Figure 4L), suggesting a mechanism of post-transcriptional regulation on HIF1 $\alpha$ . We

254 then treated the ZHX2 knockdown cells with the proteasome inhibitor MG132 under  
255 hypoxia, which could fully rescue the HIF1 $\alpha$  protein level in the knockdown cells (Figure  
256 4M). Altogether, these data suggested ZHX2 controls HIF1 $\alpha$  protein stability by preventing  
257 proteasome-mediated degradation. On the other hand, western blot analysis showed that  
258 HIF1 $\alpha$  knockdown did not affect ZHX2 protein levels (Figure 4-figure supplement 4F). It is  
259 important to note that the detailed mechanism on how ZHX2 binds with HIF1 and  
260 transactivates HIF1 signaling remains unclear, which awaits future investigation.

261 To identify the direct downstream target genes of ZHX2 and HIF that may be  
262 important in TNBC, we performed chromatin immunoprecipitation followed by high-  
263 throughput sequencing (ChIP-seq) to assess the genomic binding pattern of ZHX2 in TNBC.  
264 We identified 957 binding sites across the genome, of which 94% of them overlap with  
265 H3K27ac and 96% of them overlap with H3K4me3 (Figure 5A), indicating these overlapping  
266 peaks bound preferentially to active promoters for gene expression (Shlyueva *et al*, 2014).  
267 We again focused on the ZHX2 positively regulated genes (downregulated following ZHX2  
268 silencing by shRNA) that exhibited ZHX2 binding in the promoter (transcription start site  $\pm$  5  
269 kb). These promoters (n = 258) demonstrated robust enrichment for HIF1 $\alpha$  (Chen *et al.*,  
270 2018), as well as H3K4me3 and H3K27ac (Rhie *et al*, 2014) (Figure 5A). We then filtered  
271 these genes further, focusing on only those bound and positively regulated by HIF1 $\alpha$  and  
272 identified seven interesting candidate genes for functional validation and follow-up  
273 (*PTGES3L*, *KDM3A*, *WSB1*, *AP2B1*, *OXSR1*, *RUNDC1* and *COX20*). We performed qRT-  
274 PCR analysis and found that ZHX2 depletion by shRNAs indeed led to decreased mRNA  
275 expression for all of these target genes (Figure 5B). Conversely, we also overexpressed  
276 ZHX2 in TNBC cells and found that ZHX2 overexpression led to increased expression of  
277 these target genes (Figure 5C), arguing that ZHX2 promotes HIF signaling by at least  
278 directly activating these targets in TNBC. To further strengthen whether these are HIF

279 downstream target genes, we also obtained HIF DKO cells and found that HIF depletion led  
280 to decreased expression of these target genes under hypoxic conditions (Figure 5D). Taken  
281 together, our data suggests that ZHX2 binds with HIF and affects HIF activity in TNBC.

282

### 283 **Potential Important Sites on ZHX2 that May affect its Function in TNBC**

284 Previous research showed that ZHX2 contributed to ccRCC tumorigenesis by at least  
285 partially activating NF- $\kappa$ B signaling (Zhang *et al.*, 2018). In that setting, ZHX2 may act as  
286 transcriptional activator by overlapping primarily with H3K4me3 and H3K27Ac epigenetic  
287 marks. However, it remains unclear whether there may be critical residues on ZHX2 that  
288 may mediate its binding to DNA and exert its transcriptional activity. To this end, we  
289 conducted both data-driven analyses and structural simulations to predict the essential DNA  
290 binding residues. Detailed methods are described in Supplementary. Briefly, many DNA-  
291 bound structures of human HD2, 3 and 4 (PDB ID: 3NAU, 2DMP and 3NAR) were  
292 homology-modeled by SWISS-MODEL (23) using as many X-ray/NMR-solved homologous  
293 DNA-bound HD proteins as the structural templates. 12, 20 and 15 DNA-bound complexes  
294 were modeled for HD2, HD3 and HD4, respectively (Figure 5-figure supplement 5). We then  
295 counted the number of DNA-protein contacts at the atomic level for each residue in the  
296 DNA-contacting helices in HDs, normalized by the number of DNA-complexed structures  
297 used for each HD. The top-ranked DNA-contacting residues in HDs are listed together with  
298 their evolutionary conservation in Table supplement 2. We found that Lys485/Arg491 in HD2,  
299 Arg581 in HD3 and Arg674 in HD4 are the most contacted residues in DNA binding, where  
300 Arg674 receives the highest contact among all the HD proteins. Our MD simulations further  
301 revealed that Arg491 in HD2, Arg581 in HD3 and Arg674 in HD4 indeed have the highest  
302 affinity with DNA, in terms of MM/PBSA-derived contact potential energies (see Table  
303 supplement 3 and 4; Movie Supplement1, 2 and 3), among other residues in the same

304 proteins. Among the top 4 DNA-contacting residues in each of the HD proteins, we consider  
305 those with relatively high sequence conservation being important for ZHX2 binding to DNA,  
306 which may affect the phenotype of TNBC. These residues are Asp489 (D489), Arg491  
307 (R491), Glu579 (E579), Arg581 (R581), Lys582 (K582), Arg674 (R674), Glu678 (E678), and  
308 Arg680 (R680) (Table Supplement 2).

309         Given this, we generated a series of TNBC breast cancer cell lines where we  
310 depleted endogenous ZHX2 expression and restored with exogenous shRNA-resistant  
311 ZHX2 WT or mutant versions (D489A, R491A, E579A, R581A, K582, R674A, E678A, or  
312 R680A). First, upon generation of stable cell lines, we performed western blot analyses and  
313 confirmed that these cell lines all expressed similar amounts of ZHX2, relatively comparable  
314 to endogenous ZHX2 levels in MDA-MB-231 cells (Figure 6A). Next, we performed 2-D cell  
315 proliferation MTS assays. Our cell proliferation data showed that consistent with our  
316 previous results, ZHX2 depletion led to decreased TNBC cell proliferation, and this  
317 phenotype was completely rescued by WT ZHX2. On the other hand, some of mutants  
318 (including R581A and R674A) failed to rescue the cell growth defect in ZHX2 shRNA  
319 infected MDA-MB-231 cells (Figure 6B).

320         Motivated by our cell proliferation assay results, we further examined cell  
321 proliferation phenotypes using long-term 2-D colony formation, 3-D anchorage independent  
322 growth and cell invasion assays. ZHX2 R491A, R581A and R674A mutants displayed a  
323 defect in cell growth in TNBC cell lines (Figure 6C-F). In summary, our results showed that  
324 there may be multiple residues (including R491, R581 and R674) that may be important in  
325 regulating the phenotype of ZHX2 in TNBC. Co-IP analysis showed that mutated ZHX2  
326 (R581A and R674A) can interact with HIF1 $\alpha$  as wild type ZHX2 (Figure 6G). While western  
327 blot analysis showed that the ZHX2 mutations did not affect the HIF1 $\alpha$  protein levels  
328 (Figure 6H), qRT-PCR showed that the ZHX2 mutations indeed led to decreased mRNA

329 expression of HIF1 $\alpha$  targeted genes (Figure 6I). Taken together, our data suggests that  
330 these residues are essential for mediating the transactivation of ZHX2 on HIF1 $\alpha$  target  
331 genes.

332

### 333 **Discussion**

334 In this study, we discover that ZHX2 is an important oncogene in TNBC. Depletion of ZHX2  
335 leads to decreased TNBC cell proliferation as well as invasion. By performing gene  
336 expression analyses, ZHX2-regulated genes display a significant overlap with HIF-regulated  
337 genes in TNBC. ZHX2 binds with HIF1 $\alpha$  and HIF1 $\beta$  and regulates HIF1 $\alpha$  protein levels and  
338 transcriptional activity. By using structural simulation and the re-constitution system, we  
339 pinpoint residues (R491, R581 and R674) on ZHX2 that may be important for its DNA  
340 binding function as well as tumorigenic potential. Overall, our study establishes an important  
341 role of ZHX2 in regulating HIF1 $\alpha$  signaling and tumorigenesis in TNBC.

342 From a genomic perspective, it is known that *ZHX2* is located on 8q24, a  
343 chromosomal region frequently amplified in cancers. Indeed, *ZHX2* is amplified in several  
344 cancers, including breast cancer, ovarian cancer, and prostate cancer. In most cases, ZHX2  
345 is co-amplified with another well-established oncogene *c-Myc* (Figure 1A-C). This finding  
346 bears several implications. First, it suggests that ZHX2 and *c-Myc* may act in concert in  
347 promoting tumorigenesis. Second, the role of ZHX2 in cancers can be context dependent.  
348 Although ZHX2 may be amplified in multiple cancers, its protein levels can be regulated  
349 post-transcriptionally. Our previous research showed that in ccRCC, ZHX2 can be regulated  
350 by pVHL potentially through hydroxylation on multiple proline residues in the PRR domain  
351 (Zhang *et al.*, 2018). Therefore, the presence or absence of factors that mediate prolyl  
352 hydroxylation in the same niche as ZHX2 can dictate its regulation and downstream  
353 function. Further, it remains uncertain whether ZHX2 interacts with DNA directly or indirectly

354 via other transcription factors to exert its transcriptional regulation on downstream target  
355 genes. The repertoire of different co-activators/repressors with which ZHX2 may interact  
356 can therefore govern its localization in the genome and thus its downstream function in  
357 different cancer settings.

358         Thus far, it remains unclear which residues on ZHX2 are critical for its transcriptional  
359 activity as well as its oncogenic role in cancer. We also did MD simulation to confirm the  
360 import residues for regulating the phenotype of ZHX2. We found that the top DNA-  
361 contacting residues across the three HDs were arginine namely Arg491, Arg581, and  
362 Arg674. In terms of interaction, it can be observed that Arg491 and Arg581 of HD 2 and 3,  
363 respectively, were seen to be interacting with the DNA's phosphate backbone throughout  
364 the 350ns MD simulations (Movie supplement 1-2). However, in the case of HD 4, Arg674  
365 was seen to be interacting first with the nucleobases within 4Å distance. Shortly after  
366 ~120ns, the DNA slowly drifted away but this was prevented because of an interaction  
367 between Arg674 and the DNA's phosphate backbone (Movie supplement 3). These  
368 arginine-DNA phosphate backbone interactions could be critical for the stabilization of  
369 transcription factor binding with the DNA to either stimulate or repress the transcription of a  
370 specific gene. By performing ZHX2 depletion and reconstitution experiments, we found that  
371 several residues located in the HDs of ZHX2 may be important for its oncogenic role in  
372 TNBC (Figure 6A-F). In addition, these three arginine residues are found to be important on  
373 mediating the effect of ZHX2 on transactivating HIF1 $\alpha$  activity in TNBC cells (Figure 6I).  
374 Further research needs to be performed to determine whether these residues are critical for  
375 ZHX2 localization to DNA, either directly or indirectly via recruitment of co-  
376 activators/repressors. Lastly, given that we already found three residues important for the  
377 function of ZHX2 in TNBC, we can potentially design small peptides to competitively bind  
378 ZHX2 and inhibit its localization to DNA. By engineering these peptides to be membrane



379 permeable, we can potentially test whether they can inhibit the oncogenic role of ZHX2 in  
380 TNBC. Given that ZHX2 inhibitors are still not available at this time, these peptide inhibitors  
381 can be used as a proof-of-principle approach to motivate further development of specific  
382 ZHX2 inhibitors in potential cancer therapies.

383

## 384 **Materials and Methods**

385 **Cell Culture and Reagents.** MDA-MB-231, MDA-MB-436, MCF-7, Hs578T and 293T cells  
386 were cultured in Dulbecco's Modified Eagle's Medium (DMEM) (GIBCO 11965118)  
387 supplemented with 10% fetal bovine serum (FBS) and 1% penicillin-streptomycin (Pen  
388 Strep). T47D, BT474, HCC1428, HCC3153, HCC1143, HCC70 and MDA-MB-468 cells  
389 were cultured in 10% FBS, 1% Pen Strep RPMI 1640 (GIBCO 11875093). Normal breast  
390 epithelial cells HMLE and MCF-10A were cultured in MEGM (Lonza CC-3151) containing  
391 SingleQuotes Supplements (Lonza CC-4136). 293T cells were obtained from UNC Tissue  
392 Culture Facility and authenticated by short tandem repeat testing. HMLE and HCC3153 are  
393 in-house cell lines. All other cell lines were obtained from ATCC. Mycoplasma detection was  
394 routinely performed to ensure cells were not infected with mycoplasma by using MycoAlert  
395 Detection kit (Lonza, LT07-218). Cells were maintained at 37°C in a 5% CO<sub>2</sub> incubator.  
396 Cells were incubated overnight in 1% O<sub>2</sub> hypoxia chamber for hypoxia treatment.  
397 Doxycycline (D9891) was purchased from Sigma-Aldrich, DMOG (D1070-1g) was from  
398 Frontier Scientific, and MG132 (IZL-3175-v) was from Peptide International.

399

400 **Amplification status of ZHX2 in different breast cancer subtype.** All data in table S4  
401 were got from cBioPortal (<https://www.cbioportal.org/>) (Gao *et al*, 2013). We searched the  
402 percentage of ZHX2 amplification in all breast cancer datasets, and found ZHX2 was mainly  
403 amplified in seven datasets: Breast Cancer (METABRIC, Nature 2012(Curtis *et al*, 2012b) &

404 Nat Commun 2016(Pereira *et al*, 2016)), The Metastatic Breast Cancer Project (Provisional,  
405 February 2020), Breast Invasive Carcinoma (TCGA, Cell 2015)(Ciriello *et al*, 2015), Breast  
406 Invasive Carcinoma (TCGA, Firehose Legacy), Breast Invasive Carcinoma (TCGA,  
407 PanCancer Atlas), Metastatic Breast Cancer (INSERM, PLoS Med 2016)(Lefebvre *et al*,  
408 2016), and Breast Invasive Carcinoma (TCGA, Nature 2012)(CancerGenomeAtlasNetwork,  
409 2012). Two datasets, Breast Invasive Carcinoma (TCGA, PanCancer Atlas) and Metastatic  
410 Breast Cancer (INSERM, PLoS Med 2016)(Lefebvre *et al.*, 2016), did not show the ER, PR  
411 and HER2 status, and were excluded from our study. In all the datasets, ER and PR status  
412 were determined by immunohistochemistry (IHC). Three datasets, Breast Cancer  
413 (METABRIC, Nature 2012(Curtis *et al.*, 2012b) & Nat Commun 2016(Pereira *et al.*, 2016)),  
414 The Metastatic Breast Cancer Project (Provisional, February 2020), and Breast Invasive  
415 Carcinoma (TCGA, Cell 2015)(Ciriello *et al.*, 2015) assigned the HER2 status by the original  
416 researchers. Two datasets, Breast Invasive Carcinoma (TCGA, Cell 2015)(Ciriello *et al.*,  
417 2015) and Breast Invasive Carcinoma (TCGA, Firehose Legacy) assigned the HER2 status  
418 by two standard, IHC and fluorescence in situ hybridization (FISH). In this study, HER2+  
419 status in these two datasets, were determined by IHC.

420

421 **Immunoblotting and Immunoprecipitation Experiments.** EBC buffer (50mM Tris-HCl  
422 pH8.0, 120 mM NaCl, 0.5% NP40, 0.1 mM EDTA and 10% glycerol) supplemented with  
423 complete protease inhibitor and phosphoSTOP tablets (Roche Applied Bioscience) was  
424 used to harvest whole cell lysates at 4°C. Cell lysate concentrations were measured by  
425 Protein assay dye (Bio Rad). An equal amount of cell lysates was resolved by SDS-PAGE.  
426 For immunoprecipitation, whole-cell lysates were prepared in EBC buffer supplemented with  
427 protease inhibitor and phosphatase inhibitor. The lysates were clarified by centrifugation and  
428 then incubated with primary antibodies or HA antibody conjugated beads (HA beads, Roche

429 Applied Bioscience) overnight at 4°C. For primary antibody incubation, cell lysates were  
430 incubated further with protein G sepharose beads (Roche Applied Bioscience) for 2 hours at  
431 4°C. The bound complexes were washed with EBC buffer 5x times and were eluted by  
432 boiling in SDS loading buffer. Bound proteins were resolved in SDS-PAGE followed by  
433 immunoblotting analysis.

434

435 **Antibodies.** Antibodies used for immunoblotting, immunoprecipitation and IHC staining  
436 were as follows: Rabbit anti ZHX2 antibody (Genetex, 112232), Rabbit anti HIF1 $\alpha$  (Cell  
437 Signaling, 36169), Rabbit anti HIF1 $\beta$  (Cell Signaling, 5537), Rabbit anti VHL (Cell Signaling,  
438 68547), rabbit anti HA tag (Cell Signaling, 3724), mouse anti  $\alpha$ -Tubulin (Cell Signaling,  
439 3873). Peroxidase conjugated goat anti-mouse secondary antibody (31430) and peroxidase  
440 conjugated goat anti-rabbit secondary antibody (31460) were from Thermo Scientific.

441

442 **Plasmids.** pBABE HA-VHL, pcDNA-3.1-FLAG-HA-ZHX2(WT), pcDNA-3.1-FLAG-HA-  
443 ZHX2(ZHX2sh45 resistant), and pcDNA-3.1- HA-HIF1 $\alpha$  were previously described. pcDNA-  
444 3.1-FLAG-HA-ZHX2(D489A), pcDNA-3.1-FLAG-HA-ZHX2(R491A), pcDNA-3.1-FLAG-HA-  
445 ZHX2(E579A), pcDNA-3.1-FLAG-HA-ZHX2 (R581A), pcDNA-3.1-FLAG-HA-ZHX2 (K582A),  
446 pcDNA-3.1-FLAG-HA-ZHX2 (R674A), pcDNA-3.1-FLAG-HA-ZHX2 (E678A), and pcDNA-  
447 3.1-FLAG-HA-ZHX2 (R680A) were constructed using standard molecular biology  
448 techniques. Quick Change XL Site-Directed Mutagenesis Kit (200516, Agilent Technologies)  
449 was used to construct ZHX2 mutants. The GATEWAY Cloning Technology (11789020 and  
450 11791019, Invitrogen) was used to recombine plasmids for virus production. All plasmids  
451 were sequenced to confirm validity.

452

453 **Lentiviral shRNA, and sgRNA Vectors.** Lentiviral ZHX2 shRNAs (pLKO vector based)

454 were obtained from Broad Institute TRC shRNA library. sgRNAs were cloned into the  
455 lentiCRISPR v2 backbone (Addgene Plasmid #52961). Target sequences were as follows:

456 Control shRNA: AACAGTCGCGTTTGCGACTGG

457 ZHX2 shRNA (43): CCCACTAAATACTACCAAATA

458 ZHX2 shRNA (45): CCGTAGCAAGGAAAGCAACAA

459 HIF1 $\alpha$  shRNA (3809): CCAGTTATGATTGTGAAGTTA

460 HIF1 $\alpha$  shRNA (3810): GTGATGAAAGAATTACCGAAT

461 Control sgRNA: GCGAGGTATTCGGCTCCGCG

462 VHL sgRNA (1): CATACGGGCAGCACGACGCG

463 VHL sgRNA (2): GCGATTGCAGAAGATGACCT

464 VHL sgRNA (8): ACCGAGCGCAGCACGGGCCG

465

466 **Virus Production and Infection.** 293T packaging cell lines were used for lentiviral  
467 amplification. Lentiviral infection was carried out as previously described (Zhang *et al.*,  
468 2018). Briefly, viruses were collected at 48 h and 72 h post-transfection. After passing  
469 through 0.45- $\mu$ m filters, viruses were used to infect target cells in the presence of 8  $\mu$ g/mL  
470 polybrene. Subsequently, target cell lines underwent appropriate antibiotic selection.

471

472 **Cell Viability Assay.** For MTS assay, cells were seeded in triplicate in 96-well plates (1000  
473 cells/well) in appropriate growth medium. At indicated time points, cells were replaced with  
474 90  $\mu$ l fresh growth medium supplemented with 10  $\mu$ l MTS reagents (Abcam, ab197010),  
475 followed by incubation at 37°C for 1-4 hrs. OD absorbance values were measured at 490  
476 nm using a 96-well plate reader (BioTek).

477

478 **2-D Cell Proliferation Assay.** For colony formation assays, cells were seeded in duplicate  
479 in 6-well plates ( $2 \times 10^3$  cells/well) in appropriate growth medium. Media was changed every  
480 two days. After 7 days, cells were fixed with 4% formaldehyde for 10 minutes at room  
481 temperature, stained for 10 minutes with 0.5% crystal violet and then washed several times  
482 with distilled water. Once dried, the plates were scanned.

483

484 **3-D Anchorage Independent Soft Agar Growth Assay.** Cells were plated in a top layer at  
485 a density of 10,000 cells per ml in complete medium with 0.4% agarose (Life Technologies,  
486 BP165-25), onto bottom layers composed of medium with 1% agarose followed by  
487 incubation at 4°C for 10 minutes. Afterwards, cells were moved to a 37°C incubator. Every 4  
488 days, 200µl of complete media were added onto the plate. After 2-4 weeks, the extra liquid  
489 on the plate was aspirated, and 1 ml medium supplemented with 100 µg/ml  
490 iodonitrotetrazolium chloride solution was added onto each well. After incubating overnight  
491 at 37°C, the colonies were captured by an image microscope and quantified after a whole  
492 plate scan.

493

494 **Cell invasion assay** MDA-MB-231 and MDA-MB-468 cell invasion assay was performed  
495 using BD BioCoat Matrigel Invasion Chamber (354480) according to the manufacturer's  
496 instructions. In total,  $3 \times 10^4$  (for MDA-MB-231) and  $3 \times 10^5$  (for MDA-MB-468) cells were  
497 inoculated into each chamber in triplicate and incubated for 18 h at 37 °C, 5% CO<sub>2</sub>  
498 incubator. The cells on the lower surface of the membrane were stained using Diff-Quick  
499 stain kit (B4132-1A) from SIEMENS, and then counted under EVOS XL Core Microscope  
500 (Cat# AMEX1000, Thermo Fisher Scientific).

501

502 **RNA-seq Analysis.** Procedures was described previously (Liao *et al*, 2020). Briefly, Total  
503 RNA from triplicates was extracted from MDA-MB-231 cells infected with control or ZHX2  
504 shRNAs by using RNeasy kit with on column DNase digestion (Qiagen). Library preparation  
505 and sequencing were performed by BGI as paired end 50bp reads. Reads were then filtered  
506 for adapter contamination using cutadapt (Patro *et al*, 2017) and filtered such that at least  
507 90% of bases of each read had a quality score >20. Reads were aligned to the reference  
508 genome (hg19) using STAR version 2.5.2b, and only primary alignments were retained  
509 (Love *et al*, 2014). Reads overlapping blacklisted regions of the genome were then  
510 removed. Transcript abundance was then estimated using salmon (Miller *et al*, 2012), and  
511 differential expression was detected using DESeq2 (Bird *et al*, 2010). RNA-seq data are  
512 available at GSE175487. Pathway enrichments were calculated using g:Profiler (Reimand *et*  
513 *al*, 2019) where the pathway database was supplemented with the list of HIF DKO  
514 downregulated genes to obtain the adjusted p-value indicating a significant association.  
515 Association with the HALLMARK hypoxia pathway was conducted using GSEA (Reimand *et*  
516 *al.*, 2019).

517

518 **Real-Time PCR.** Total RNA was isolated with RNeasy mini kit (Qiagen). First strand cDNA  
519 was generated with an iScript cDNA synthesis kit (BioRad). Real-time PCR was performed  
520 in triplicate. Real time PCR primer sequences are listed in Table S5, Supplementary.

521

522 **ChIP-seq Analyses.** MDA-MB-231 cells were infected by HA-ZHX2 which is resistant to  
523 ZHX2 sh45, and then infected by ZHX2 sh45. ChIP was performed with HA tag (Cell  
524 Signaling, 3724). The ChIP-Seq library was prepared using a ChIP-Seq DNA sample  
525 preparation kit (Illumina) according to manufacturer's instructions. Samples were sequenced  
526 on an Illumina HiSeq2500 with single-end 76 bp reads. Reads were then filtered for adaptor

527 contamination using Cutadapt and filtered such that at least 90% of bases of each read had  
528 a quality score > 20. Duplicated sequences were then capped at a maximum of 5  
529 occurrences, and reads were aligned to the reference genome (hg19) using STAR (Dobin *et*  
530 *al*, 2013) version 2.5.2b retaining only primary alignments. Reads overlapping blacklisted  
531 regions of the genome were then removed. Reads were then extended *in silico* to a  
532 fragment size of 250 bp, and regions of significant enrichment relative to input control were  
533 identified using MACS2 (Zhang *et al*, 2008). A unified set of enriched regions for ZHX2 was  
534 obtained by taking the intersection of the two replicates using bedtools (Quinlan & Hall,  
535 2010). ChIP-seq data for HIF1 $\alpha$  was obtained from GSE108833, and data for H3K4me3 and  
536 H3K27ac were obtained from GSE49651. ChIP enrichment heatmaps over promoters were  
537 generated using deepTools (Ramirez *et al*, 2016).

538

539 **Orthotopic Tumor Xenograft.** Procedures for animal studies was described previously  
540 (Liao *et al.*, 2020). Briefly, six-week-old female NOD SCID Gamma mice (NSG, Jackson  
541 lab) were used for xenograft studies. Approximately  $1 \times 10^6$  viable MDA-MB-231 cells  
542 expressing Teton control or Teton ZHX2 shRNAs were resuspended in 1: 1 ratio in 50  $\mu$ l  
543 medium and 50  $\mu$ l matrigel (Corning, 354234) and injected orthotopically into the fourth  
544 mammary fat pad of each mouse. After cell injection and following two consecutive weeks of  
545 tumor monitoring to ensure the tumor was successfully implanted, mice were fed Purina  
546 rodent chow with doxycycline (Research Diets Inc., #5001). Tumor size was measured twice  
547 a week using an electronic caliper. Tumor volumes were calculated with the formula: volume  
548 =  $(L \times W^2)/2$ , where L is the tumor length and W is the tumor width measured in millimeters.  
549 The rough mass of tumors was presented as mean  $\pm$  SEM and evaluated statistically using *t*  
550 test. After mice were sacrificed, lung ex vivo imaging was performed immediately to  
551 examine tumor metastasis. All animal experiments were in compliance with National

552 Institutes of Health guidelines and were approved by the University of Texas, Southwestern  
553 Medical Center Institutional Animal Care and Use Committee.

554

555 **Binding Free Energy Calculations using MM/PBSA.** To calculate the binding Gibbs free  
556 energy change between two groups of molecules, we used Molecular Mechanics Poisson–  
557 Boltzmann Surface Area continuum solvation (MM/PBSA) approach (Miller *et al.*, 2012) to  
558 analyze trajectories out of Molecular Dynamics (MD) simulations (detailed in Supporting  
559 Information). In this approach, the binding Gibbs free energy change,  $\Delta G_{\text{bind}}$ , can be  
560 expressed in terms of the xyz ( $\Delta G_{\text{MM}}$ ), xyz ( $\Delta G_{\text{solv}}$ ), and the entropy of the system ( $T\Delta S$ )  
561 as shown in equation (1).

$$562 \quad \Delta G_{\text{bind}} = \Delta G_{\text{MM}} + \Delta G_{\text{solv}} - T\Delta S \quad (1)$$

563 where  $\Delta G_{\text{MM}} = \Delta G_{\text{elec}} + \Delta G_{\text{VDW}}$  and  $\Delta G_{\text{solv}} = \Delta G_{\text{polar}} + \Delta G_{\text{nonpolar}}$

564

565 **Statistical Analysis.** All statistical analysis was conducted using Prism 8.0 (GraphPad  
566 Software). All graphs depict mean  $\pm$  SEM unless otherwise indicated. Statistical  
567 significances are denoted as n.s. (not significant;  $P > 0.05$ ), \* $P < 0.05$ , \*\* $P < 0.01$ , \*\*\* $P <$   
568  $0.001$ , \*\*\*\* $P < 0.0001$ . The numbers of experiments are noted in Figure legends. To assess  
569 the statistical significance of a difference between two conditions, we used unpaired two-tail  
570 student's *t*-test. For experiments comparing more than two conditions, differences were  
571 tested by a one-way ANOVA followed by Dunnett's or Tukey's multiple comparison tests.

572

### 573 **Data availability**

574 RNA-Seq and CHIP-Seq data are available GEO175487. All data generated or analysed  
575 during this study are included in the manuscript and supporting files.

576



577 **Acknowledgments**

578 This work was supported in part by the National Cancer Institute (Q.Z., R01CA211732 and  
579 R21CA223675), Cancer Prevention and Research Institute of Texas (CPRIT, RR190058 to  
580 Q.Z) and American Cancer Society (RSG-18-059-01-TBE). J.M.S. and T.S.P. were  
581 supported by NINDS (P30NS045892). Q.Z is an American Cancer Society Research  
582 Scholar, CPRIT Scholar in Cancer Research, V Scholar, Kimmel Scholar, Susan G. Komen  
583 Career Catalyst awardee and Mary Kay Foundation awardee.

584

585 **Funding:** National Cancer Institute (R01CA211732), Cancer Prevention and Research  
586 Institute of Texas (CPRIT, RR190058)

587

588 **Author contributions:** C.L. W.F. and Q.Z. conceived, performed and interpreted  
589 experiments. W.F. performed the ChIP sequencing experiment. J.M.S., T.S.P. and C.F.  
590 performed the RNA-seq and ChIP-seq bioinformatics analyses. C.L. and R.S. performed the  
591 animal studies. C.L.O., H.L. performed data-driven analyses and structural simulations.  
592 Y.Y., L.H., R.S., U.M., W.L., W.K., W.L. and L.Y. helped to provide critical advice and  
593 revisions for the paper. Q.Z., C.L. and W.F. wrote the paper with critical comments from all  
594 authors.

595

596 **Competing interests:** The authors declare no conflict of interests.

597

598 **References**

599 Anders CK, Carey LA (2009) Biology, metastatic patterns, and treatment of patients with  
600 triple-negative breast cancer. *Clin Breast Cancer* 9 Suppl 2: S73-81  
601 Appelhoff RJ, Tian YM, Raval RR, Turley H, Harris AL, Pugh CW, Ratcliffe PJ, Gleadle  
602 JM (2004) Differential function of the prolyl hydroxylases PHD1, PHD2, and PHD3 in the

603 regulation of hypoxia-inducible factor. *The Journal of biological chemistry* 279: 38458-  
604 38465

605 Armellini A, Sarasquete ME, Garcia-Sanz R, Chillon MC, Balanzategui A, Alcoceba M,  
606 Fuertes M, Lopez R, Hernandez JM, Fernandez-Calvo J *et al* (2008) Low expression of  
607 ZHX2, but not RCBTB2 or RAN, is associated with poor outcome in multiple myeloma. *Br J*  
608 *Haematol* 141: 212-215

609 Bird LE, Ren J, Nettleship JE, Folkers GE, Owens RJ, Stammers DK (2010) Novel structural  
610 features in two ZHX homeodomains derived from a systematic study of single and multiple  
611 domains. *BMC Struct Biol* 10: 13

612 Bos R, Zhong H, Hanrahan CF, Mommers EC, Semenza GL, Pinedo HM, Abeloff MD,  
613 Simons JW, van Diest PJ, van der Wall E (2001) Levels of hypoxia-inducible factor-1 alpha  
614 during breast carcinogenesis. *J Natl Cancer Inst* 93: 309-314

615 Briggs KJ, Koivunen P, Cao S, Backus KM, Olenchock BA, Patel H, Zhang Q, Signoretti S,  
616 Gerfen GJ, Richardson AL *et al* (2016) Paracrine Induction of HIF by Glutamate in Breast  
617 Cancer: EglN1 Senses Cysteine. *Cell* 166: 126-139

618 Brown JM, Wilson WR (2004) Exploiting tumour hypoxia in cancer treatment. *Nature*  
619 *reviews Cancer* 4: 437-447

620 Cancer Genome Atlas N (2012) Comprehensive molecular portraits of human breast  
621 tumours. *Nature* 490: 61-70

622 CancerGenomeAtlasNetwork (2012) Comprehensive molecular portraits of human breast  
623 tumours. *Nature* 490: 61-70

624 Chen Y, Zhang B, Bao L, Jin L, Yang M, Peng Y, Kumar A, Wang JE, Wang C, Zou X *et al*  
625 (2018) ZMYND8 acetylation mediates HIF-dependent breast cancer progression and  
626 metastasis. *J Clin Invest* 128: 1937-1955

627 Ciriello G, Gatza ML, Beck AH, Wilkerson MD, Rhie SK, Pastore A, Zhang H, McLellan  
628 M, Yau C, Kandoth C *et al* (2015) Comprehensive Molecular Portraits of Invasive Lobular  
629 Breast Cancer. *Cell* 163: 506-519

630 Curtis C, Shah SP, Chin SF, Turashvili G, Rueda OM, Dunning MJ, Speed D, Lynch AG,  
631 Samarajiwa S, Yuan Y *et al* (2012a) The genomic and transcriptomic architecture of 2,000  
632 breast tumours reveals novel subgroups. *Nature* 486: 346-352

633 Curtis C, Shah SP, Chin SF, Turashvili G, Rueda OM, Dunning MJ, Speed D, Lynch AG,  
634 Samarajiwa S, Yuan Y *et al* (2012b) The genomic and transcriptomic architecture of 2,000  
635 breast tumours reveals novel subgroups. *Nature* 486: 346-352

636 Dobin A, Davis CA, Schlesinger F, Drenkow J, Zaleski C, Jha S, Batut P, Chaisson M,  
637 Gingeras TR (2013) STAR: ultrafast universal RNA-seq aligner. *Bioinformatics* 29: 15-21

638 Gao J, Aksoy BA, Dogrusoz U, Dresdner G, Gross B, Sumer SO, Sun Y, Jacobsen A, Sinha  
639 R, Larsson E *et al* (2013) Integrative analysis of complex cancer genomics and clinical  
640 profiles using the cBioPortal. *Science signaling* 6: p11

641 Gray LH, Conger AD, Ebert M, Hornsey S, Scott OC (1953) The concentration of oxygen  
642 dissolved in tissues at the time of irradiation as a factor in radiotherapy. *The British journal*  
643 *of radiology* 26: 638-648

644 Guan Y, Kuo WL, Stilwell JL, Takano H, Lapuk AV, Fridlyand J, Mao JH, Yu M, Miller  
645 MA, Santos JL *et al* (2007) Amplification of PVT1 contributes to the pathophysiology of  
646 ovarian and breast cancer. *Clinical cancer research : an official journal of the American*  
647 *Association for Cancer Research* 13: 5745-5755

648 Heitz F, Harter P, Lueck HJ, Fissler-Eckhoff A, Lorenz-Salehi F, Scheil-Bertram S, Traut A,  
649 du Bois A (2009) Triple-negative and HER2-overexpressing breast cancers exhibit an  
650 elevated risk and an earlier occurrence of cerebral metastases. *Eur J Cancer* 45: 2792-2798  
651 Hu L, Xie H, Liu X, Potjewyd F, James LI, Wilkerson EM, Herring LE, Xie L, Chen X,  
652 Cabrera JC *et al* (2020) TBK1 Is a Synthetic Lethal Target in Cancer with VHL Loss.  
653 *Cancer discovery* 10: 460-475  
654 Hu S, Zhang M, Lv Z, Bi J, Dong Y, Wen J (2007) Expression of zinc-fingers and  
655 homeoboxes 2 in hepatocellular carcinogenesis: a tissue microarray and clinicopathological  
656 analysis. *Neoplasia* 54: 207-211  
657 Ivan M, Kondo K, Yang H, Kim W, Valiando J, Ohh M, Salic A, Asara JM, Lane WS,  
658 Kaelin WG, Jr. (2001) HIF $\alpha$  targeted for VHL-mediated destruction by proline  
659 hydroxylation: implications for O<sub>2</sub> sensing. *Science* 292: 464-468  
660 Jaakkola P, Mole DR, Tian YM, Wilson MI, Gielbert J, Gaskell SJ, von Kriegsheim A,  
661 Hebestreit HF, Mukherji M, Schofield CJ *et al* (2001) Targeting of HIF- $\alpha$  to the von  
662 Hippel-Lindau ubiquitylation complex by O<sub>2</sub>-regulated prolyl hydroxylation. *Science* 292:  
663 468-472  
664 Kawata H, Yamada K, Shou Z, Mizutani T, Yazawa T, Yoshino M, Sekiguchi T, Kajitani T,  
665 Miyamoto K (2003) Zinc-fingers and homeoboxes (ZHX) 2, a novel member of the ZHX  
666 family, functions as a transcriptional repressor. *The Biochemical journal* 373: 747-757  
667 Lefebvre C, Bachelot T, Filleron T, Pedrero M, Campone M, Soria JC, Massard C, Lévy C,  
668 Arnedos M, Lacroix-Triki M *et al* (2016) Mutational Profile of Metastatic Breast Cancers: A  
669 Retrospective Analysis. *PLoS Med* 13: e1002201  
670 Liao C, Zhang Y, Fan C, Herring LE, Liu J, Locasale JW, Takada M, Zhou J, Zurlo G, Hu L  
671 *et al* (2020) Identification of BBOX1 as a Therapeutic Target in Triple-Negative Breast  
672 Cancer. *Cancer Discov* 10: 1706-1721  
673 Lin NU, Claus E, Sohl J, Razzak AR, Arnaout A, Winer EP (2008) Sites of distant  
674 recurrence and clinical outcomes in patients with metastatic triple-negative breast cancer:  
675 high incidence of central nervous system metastases. *Cancer* 113: 2638-2645  
676 Liu X, Simon JM, Xie H, Hu L, Wang J, Zurlo G, Fan C, Ptacek TS, Herring L, Tan X *et al*  
677 (2020) Genome-wide Screening Identifies SFMBT1 as an Oncogenic Driver in Cancer with  
678 VHL Loss. *Molecular cell* 77: 1294-1306 e1295  
679 Love MI, Huber W, Anders S (2014) Moderated estimation of fold change and dispersion for  
680 RNA-seq data with DESeq2. *Genome biology* 15: 550  
681 Ma H, Yue X, Gao L, Liang X, Yan W, Zhang Z, Shan H, Zhang H, Spear BT, Ma C (2015)  
682 ZHX2 enhances the cytotoxicity of chemotherapeutic drugs in liver tumor cells by repressing  
683 MDR1 via interfering with NF- $\kappa$ B. *Oncotarget* 6: 1049-1063  
684 Masui K, Gini B, Wykosky J, Zanca C, Mischel PS, Furnari FB, Cavenee WK (2013) A tale  
685 of two approaches: complementary mechanisms of cytotoxic and targeted therapy resistance  
686 may inform next-generation cancer treatments. *Carcinogenesis* 34: 725-738  
687 Miller BR, 3rd, McGee TD, Jr., Swails JM, Homeyer N, Gohlke H, Roitberg AE (2012)  
688 MMPBSA.py: An Efficient Program for End-State Free Energy Calculations. *J Chem Theory*  
689 *Comput* 8: 3314-3321  
690 Nagel S, Schneider B, Meyer C, Kaufmann M, Drexler HG, Macleod RA (2012)  
691 Transcriptional deregulation of homeobox gene ZHX2 in Hodgkin lymphoma. *Leukemia*  
692 *research* 36: 646-655

693 Nagel S, Schneider B, Rosenwald A, Meyer C, Kaufmann M, Drexler HG, MacLeod RA  
694 (2011) t(4;8)(q27;q24) in Hodgkin lymphoma cells targets phosphodiesterase PDE5A and  
695 homeobox gene ZHX2. *Genes Chromosomes Cancer* 50: 996-1009

696 Niwinska A, Murawska M, Pogoda K (2010) Breast cancer brain metastases: differences in  
697 survival depending on biological subtype, RPA RTOG prognostic class and systemic  
698 treatment after whole-brain radiotherapy (WBRT). *Annals of oncology : official journal of*  
699 *the European Society for Medical Oncology / ESMO* 21: 942-948

700 Patro R, Duggal G, Love MI, Irizarry RA, Kingsford C (2017) Salmon provides fast and  
701 bias-aware quantification of transcript expression. *Nat Methods* 14: 417-419

702 Pereira B, Chin SF, Rueda OM, Vollan HK, Provenzano E, Bardwell HA, Pugh M, Jones L,  
703 Russell R, Sammut SJ *et al* (2016) The somatic mutation profiles of 2,433 breast cancers  
704 refines their genomic and transcriptomic landscapes. *Nat Commun* 7: 11479

705 Perincheri S, Dingle RW, Peterson ML, Spear BT (2005) Hereditary persistence of alpha-  
706 fetoprotein and H19 expression in liver of BALB/cJ mice is due to a retrovirus insertion in  
707 the *Zhx2* gene. *Proceedings of the National Academy of Sciences of the United States of*  
708 *America* 102: 396-401

709 Quinlan AR, Hall IM (2010) BEDTools: a flexible suite of utilities for comparing genomic  
710 features. *Bioinformatics* 26: 841-842

711 Ramirez F, Ryan DP, Gruning B, Bhardwaj V, Kilpert F, Richter AS, Heyne S, Dundar F,  
712 Manke T (2016) deepTools2: a next generation web server for deep-sequencing data  
713 analysis. *Nucleic Acids Res* 44: W160-165

714 Reimand J, Isserlin R, Voisin V, Kucera M, Tannus-Lopes C, Rostamianfar A, Wadi L,  
715 Meyer M, Wong J, Xu C *et al* (2019) Pathway enrichment analysis and visualization of  
716 omics data using g:Profiler, GSEA, Cytoscape and EnrichmentMap. *Nature protocols* 14:  
717 482-517

718 Rhie SK, Hazelett DJ, Coetzee SG, Yan CL, Noushmehr H, Coetzee GA (2014) Nucleosome  
719 positioning and histone modifications define relationships between regulatory elements and  
720 nearby gene expression in breast epithelial cells. *Bmc Genomics* 15

721 Semenza GL (2010) Defining the role of hypoxia-inducible factor 1 in cancer biology and  
722 therapeutics. *Oncogene* 29: 625-634

723 Semenza GL (2012) Hypoxia-inducible factors in physiology and medicine. *Cell* 148: 399-  
724 408

725 Shlyueva D, Stampfel G, Stark A (2014) Transcriptional enhancers: from properties to  
726 genome-wide predictions. *Nat Rev Genet* 15: 272-286

727 Yue X, Zhang Z, Liang X, Gao L, Zhang X, Zhao D, Liu X, Ma H, Guo M, Spear BT *et al*  
728 (2012) Zinc fingers and homeoboxes 2 inhibits hepatocellular carcinoma cell proliferation  
729 and represses expression of Cyclins A and E. *Gastroenterology* 142: 1559-1570.e1552

730 Zhang J, Wu T, Simon J, Takada M, Saito R, Fan C, Liu XD, Jonasch E, Xie L, Chen X *et al*  
731 (2018) VHL substrate transcription factor ZHX2 as an oncogenic driver in clear cell renal  
732 cell carcinoma. *Science (New York, NY)* 361: 290-295

733 Zhang Y, Liu T, Meyer CA, Eeckhoute J, Johnson DS, Bernstein BE, Nusbaum C, Myers  
734 RM, Brown M, Li W *et al* (2008) Model-based analysis of ChIP-Seq (MACS). *Genome Biol*  
735 9: R137

736 Zheng X, Zhai B, Koivunen P, Shin SJ, Lu G, Liu J, Geisen C, Chakraborty AA, Moslehi JJ,  
737 Smalley DM *et al* (2014) Prolyl hydroxylation by EglN2 destabilizes FOXO3a by blocking  
738 its interaction with the USP9x deubiquitinase. *Genes & development* 28: 1429-1444

739 Zurlo G, Liu X, Takada M, Fan C, Simon JM, Ptacek TS, Rodriguez J, von Kriegsheim A,  
740 Liu J, Locasale JW *et al* (2019) Prolyl hydroxylase substrate adenylosuccinate lyase is an  
741 oncogenic driver in triple negative breast cancer. *Nat Commun* 10: 5177  
742

743 **Figures Legend**

744 **Figure. 1. ZHX2 is amplified in TNBC and is potentially regulated by pVHL.**

745 **(A, B)** The percentage of tumor samples with ZHX2 (top) or MYC (bottom) focal  
746 amplification across cancer types (A) or samples with both ZHX2 and MYC (red), ZHX2-  
747 specific (magenta), and c-MYC-specific (orange) (B). Asterisk indicates statistical  
748 significance for overlap of ZHX2 and MYC focal amplification (Fisher's exact test,  $p < 0.05$ ).

749 **(C)** The percentage of ZHX2 amplification of different breast cancer subtypes in several  
750 breast cancer datasets.

751 **(D)** The relation of ZHX2 copy number gain and its expression in TCGA datasets and  
752 METABRIC datasets.

753 **(E)** Immunoblots of lysates from different normal breast cell and breast cancer cell lines.

754 **(F)** Immunoblots of lysates from paired TNBC patient-derived non-tumor (N) and tumor (T)  
755 breast tissues.

756 **(G)** Immunoprecipitations (IP) of MDA-MB-231 cells infected with either control vector (EV)  
757 or FLAG-HA-ZHX2.

758 **(H)** Immunoblots of lysates with indicated antibodies from MDA-MB-231 cells infected with  
759 either EV or HA-VHL.

760 **(I, J)** Immunoblot of cell lysates from MDA-MB-231 (I) or MDA-MB-468 (J) infected with  
761 lentivirus encoding either VHL sgRNAs (1, 2, or 8) or control sgRNA (Ctrl).

762 **(K, L)** Immunoblots of lysates from MDA-MB-231 (K) or MDA-MB-468 (L) cells treated with  
763 indicated inhibitors for 8 h.

764 **(M)** Immunoblots of lysates from another 10 pair of TNBC patient-derived non-tumor (N) and  
765 tumor (T) breast tissues.

766 **Figure supplement 1.** ZHX2 overexpression leads worse survival and is potentially  
767 regulated by pVHL in breast cancer.

768 **Figure 1—source data.** Uncropped western blot images for Figure 1.

769 **Figure supplement 1—source data.** Uncropped western blot images for Figure  
770 supplement 1.

771

772 **Figure. 2. ZHX2 is essential for TNBC cell proliferation and invasion.**

773 **(A-H)** Immunoblot of cell lysates (A), qRT-PCR of RNA (B), cell proliferation assays (C), 2D-  
774 clones (D), soft agar growth (E) and quantification (F), invasion (G) and quantification (H) of  
775 MDA-MB-231/468 cells infected with lentivirus encoding two individual ZHX2 shRNAs (43,  
776 45) or control shRNA (Ctrl).

777 **(I-N)** Immunoblot of cell lysates (I), cell proliferation (J), 2D-clones (K), soft agar growth  
778 (upper) and invasion assays (down) (L) as well as quantification (M-N) of MDA-MB-231  
779 cells infected with lentivirus encoding ZHX2 sh45-resistant FLAG-HA-ZHX2 or control vector  
780 (EV), followed by ZHX2 sh45 or Ctrl.

781 Error bars represent mean  $\pm$  SEM, unpaired t-test. \* denotes p value of  $<0.05$ , \*\* denotes p  
782 value of  $<0.01$ , \*\*\* denotes p value of  $<0.005$ .

783 **Figure supplement 2.** The phenotype of ZHX2 shRNA on cell proliferation and invasion is  
784 due to its ontarget effect.

785 **Figure 2—source data.** Uncropped western blot images for Figure 2.

786 **Figure supplement 2—source data.** Uncropped western blot images for Figure  
787 supplement 2.

788

789

790 **Figure. 3. ZHX2 is important for TNBC cell proliferation *in vivo*.**

791 **(A-E)** Immunoblot of cell lysates (A), cell proliferation (B), 2D-colony growth (C), soft agar  
792 growth (D) and quantification (E) of MDA-MB-231 cells infected with lentivirus encoding  
793 Teton-ZHX2 shRNAs (43, 45) or Teton-Ctrl.

794 **(F-G)** Tumor growth (F), and tumor weight (G) of doxycycline-inducible ZHX2 knockdown  
795 MDA-MB-231 cells injected orthotopically at the mammary fat pad of NSG mice. Treatment  
796 of doxycycline food started as indicated time.

797 **(H)** Immunoblot of tumor lysates from mouse that injected doxycycline-inducible ZHX2  
798 knockdown MDA-MB-231 cells.

799 **(I, J)** Images (I) and plot (J) of lung necropsy of doxycycline-inducible ZHX2 knockdown  
800 MDA-MB-231 cells injected orthotopically at the mammary fat pad of NSG mice.

801 **(K, L)** Tumor growth (K), and tumor weight (L) of doxycycline induced or not induced ZHX2  
802 sh45 MDA-MB-231 cells injected orthotopically at the mammary fat pad of NSG mice.

803 **(M)** Immunoblot of tumor lysates from mouse treated with regular chow or doxycycline  
804 chow.

805 Error bars represent mean  $\pm$  SEM, unpaired t-test. \* denotes p value of <0.05, \*\* denotes p  
806 value of <0.01, \*\*\* denotes p value of <0.005.

807 **Figure supplement 3. ZHX2 is important for maintaining TNBC tumorigenesis *in vivo*.**

808 **Figure 3—source data.** Uncropped western blot images for Figure 3.

809 **Figure supplement 3—source data.** Uncropped western blot images for Figure  
810 supplement 3.

811

812 **Figure. 4. ZHX2 regulates HIF signaling in TNBC.**



813 (A) Venn diagram showing overlap in downregulated (top) and upregulated (bottom) genes  
814 between two different ZHX2 shRNA.

815 (B) Pathway analysis of the significantly decreased pathways in ZHX2 depleted MDA-MB-  
816 231 cells.

817 (C, D) Venn diagram showing overlap in differentially expressed genes (C) and  
818 downregulated genes (D) between ZHX2 depletion and HIF double knock-out (DKO)  
819 (GSE108833).

820 (E, F) Immunoblots of immunoprecipitations (IP) of MDA-MB-231 cells overexpress either  
821 FLAG-HA-ZHX2 or HA-HIF1 $\alpha$  (E) or both ZHX2 and HIF1 $\alpha$  (F).

822 (G) Immunoblots of immunoprecipitations (IP) of MDA-MB-231 cells treated with DMOG for  
823 8 hours.

824 (H, I) Immunoblots of cell lysates from MDA-MB-231 cells (H) and MDA-MB-468 cells (I)  
825 infected with lentivirus encoding ZHX2 shRNAs or Ctrl, followed treated with normoxia or  
826 hypoxia (1% O<sub>2</sub>).

827 (J, L) Immunoblots (J) and immunoprecipitations (K) of cell lysates, qRT-PCR of mRNA (L)  
828 from MDA-MB-231 cells infected with lentivirus encoding EV or FLAG-HA-ZHX2.

829 (M) Immunoblots of cell lysates from MDA-MB-231 cells infected with lentivirus encoding  
830 ZHX2 shRNAs or Ctrl treated with MG132 overnight under hypoxia (1% O<sub>2</sub>).

831 Error bars represent mean  $\pm$  SEM, unpaired *t*-test. \* denotes p value of <0.05, \*\* denotes p  
832 value of <0.01, \*\*\* denotes p value of <0.005.

833 **Figure supplement 4.** ZHX2 regulates HIF1 signaling in TNBC.

834 **Figure 4—source data.** Uncropped western blot images for Figure 4.

835 **Figure supplement 4—source data.** Uncropped western blot images for Figure  
836 supplement 4.

837

838

839 **Figure 5. Representative ZHX2 and HIF downstream targets and analysis of their**  
840 **chromatin binding motifs.**

841 (A) Integrated analyses of ChIP-Seqs (including ZHX2, HIF1 $\alpha$ , H3K4me3 and H3K27ac),  
842 signals expressed as relative to input control when available. Log2 fold change (LFC) for  
843 ZHX2 knock down RNA-Seq and HIF double knockout (HIF DKO) RNA-Seq; Critical target  
844 genes were marked on the right.

845 (B-D) qRT-PCR quantification of ZHX2 target genes from MDA-MB-231 cells infected with  
846 lentivirus encoding ZHX2 shRNAs (43, 45) (B), EV or FLAG-HA-ZHX2 (C) or HIF double  
847 knockout under normoxia (21% O<sub>2</sub>) and hypoxia (1% O<sub>2</sub>) (D).

848

849 **Figure 6. Identification of important sites on ZHX2 that may affect its function in**  
850 **TNBC.**

851 (A-F) Immunoblot of cell lysates (A), cell proliferation (B), 2D colony (top), 3D soft-agar  
852 (middle) and invasion (bottom) (C) as well as quantification 2D colony (D), 3D soft-agar (E)  
853 and invasion (F) of MDA-MB-231 cell lines infected with lentivirus encoding either ZHX2 wild  
854 type (WT) or mutation, followed by ZHX2 sh45 or Ctrl.

855 (G-I) Immunoprecipitations (G), Immunoblot (H) of cell lysates and qRT-PCR of mRNA (I) of  
856 MDA-MB-231 cells infected with lentivirus encoding either ZHX2 WT or mutation.

857 Error bars represent mean  $\pm$  SEM, n=3 replicates per group, unpaired *t*-test. \*\*\* denotes p  
858 value of <0.005.

859 **Figure supplement 5. Residue based DNA contact analysis derived from ensembles of**  
860 **DNA bound HD proteins.**

861 **Figure 6—source data.** Uncropped western blot images for Figure 6.

# Figure 1

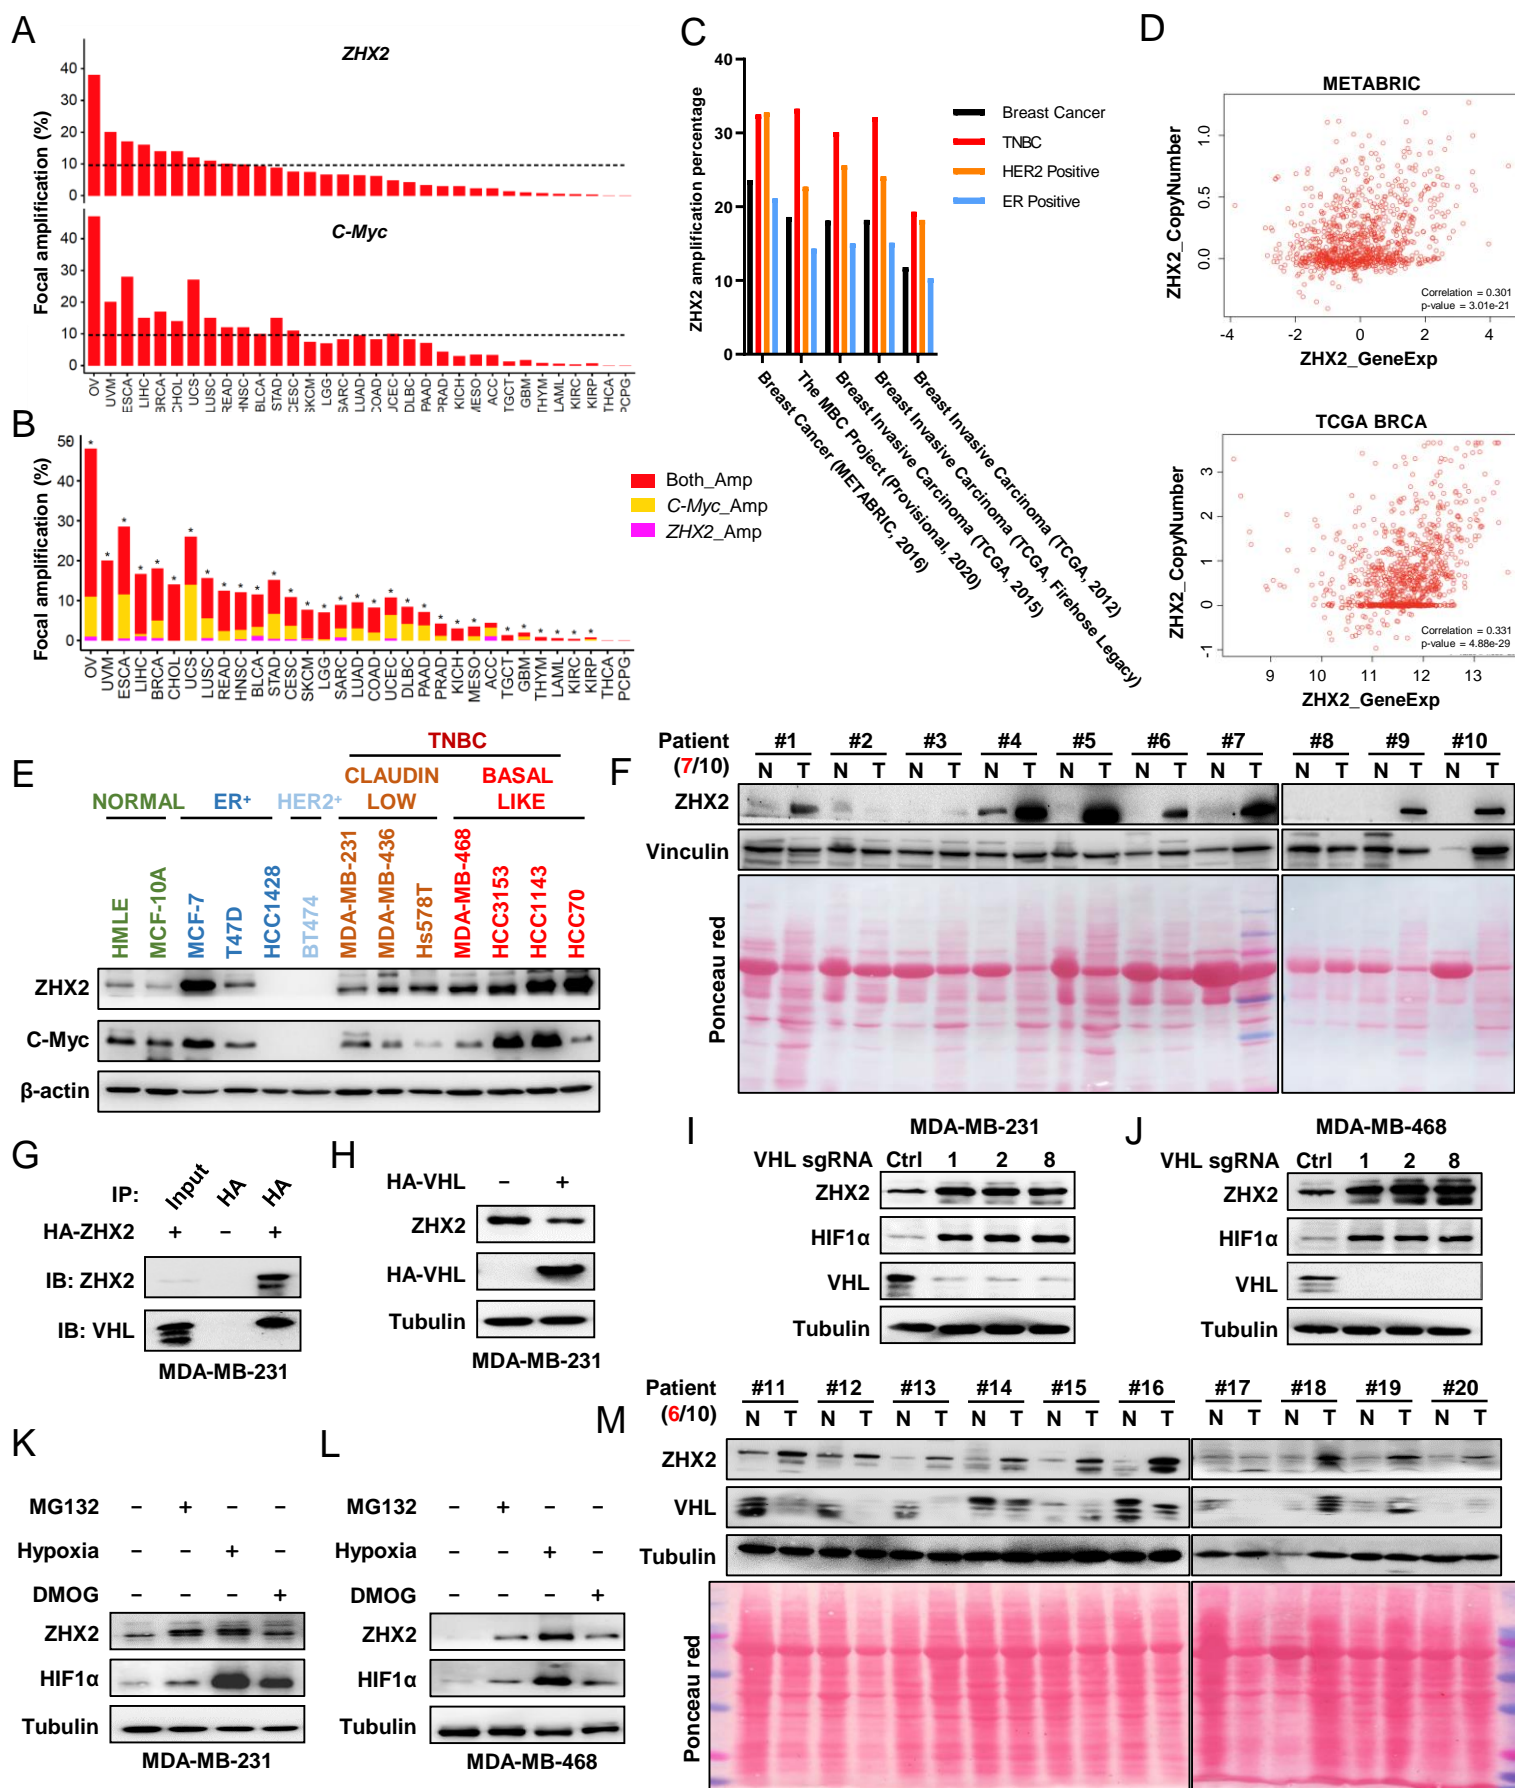

## Figure 2

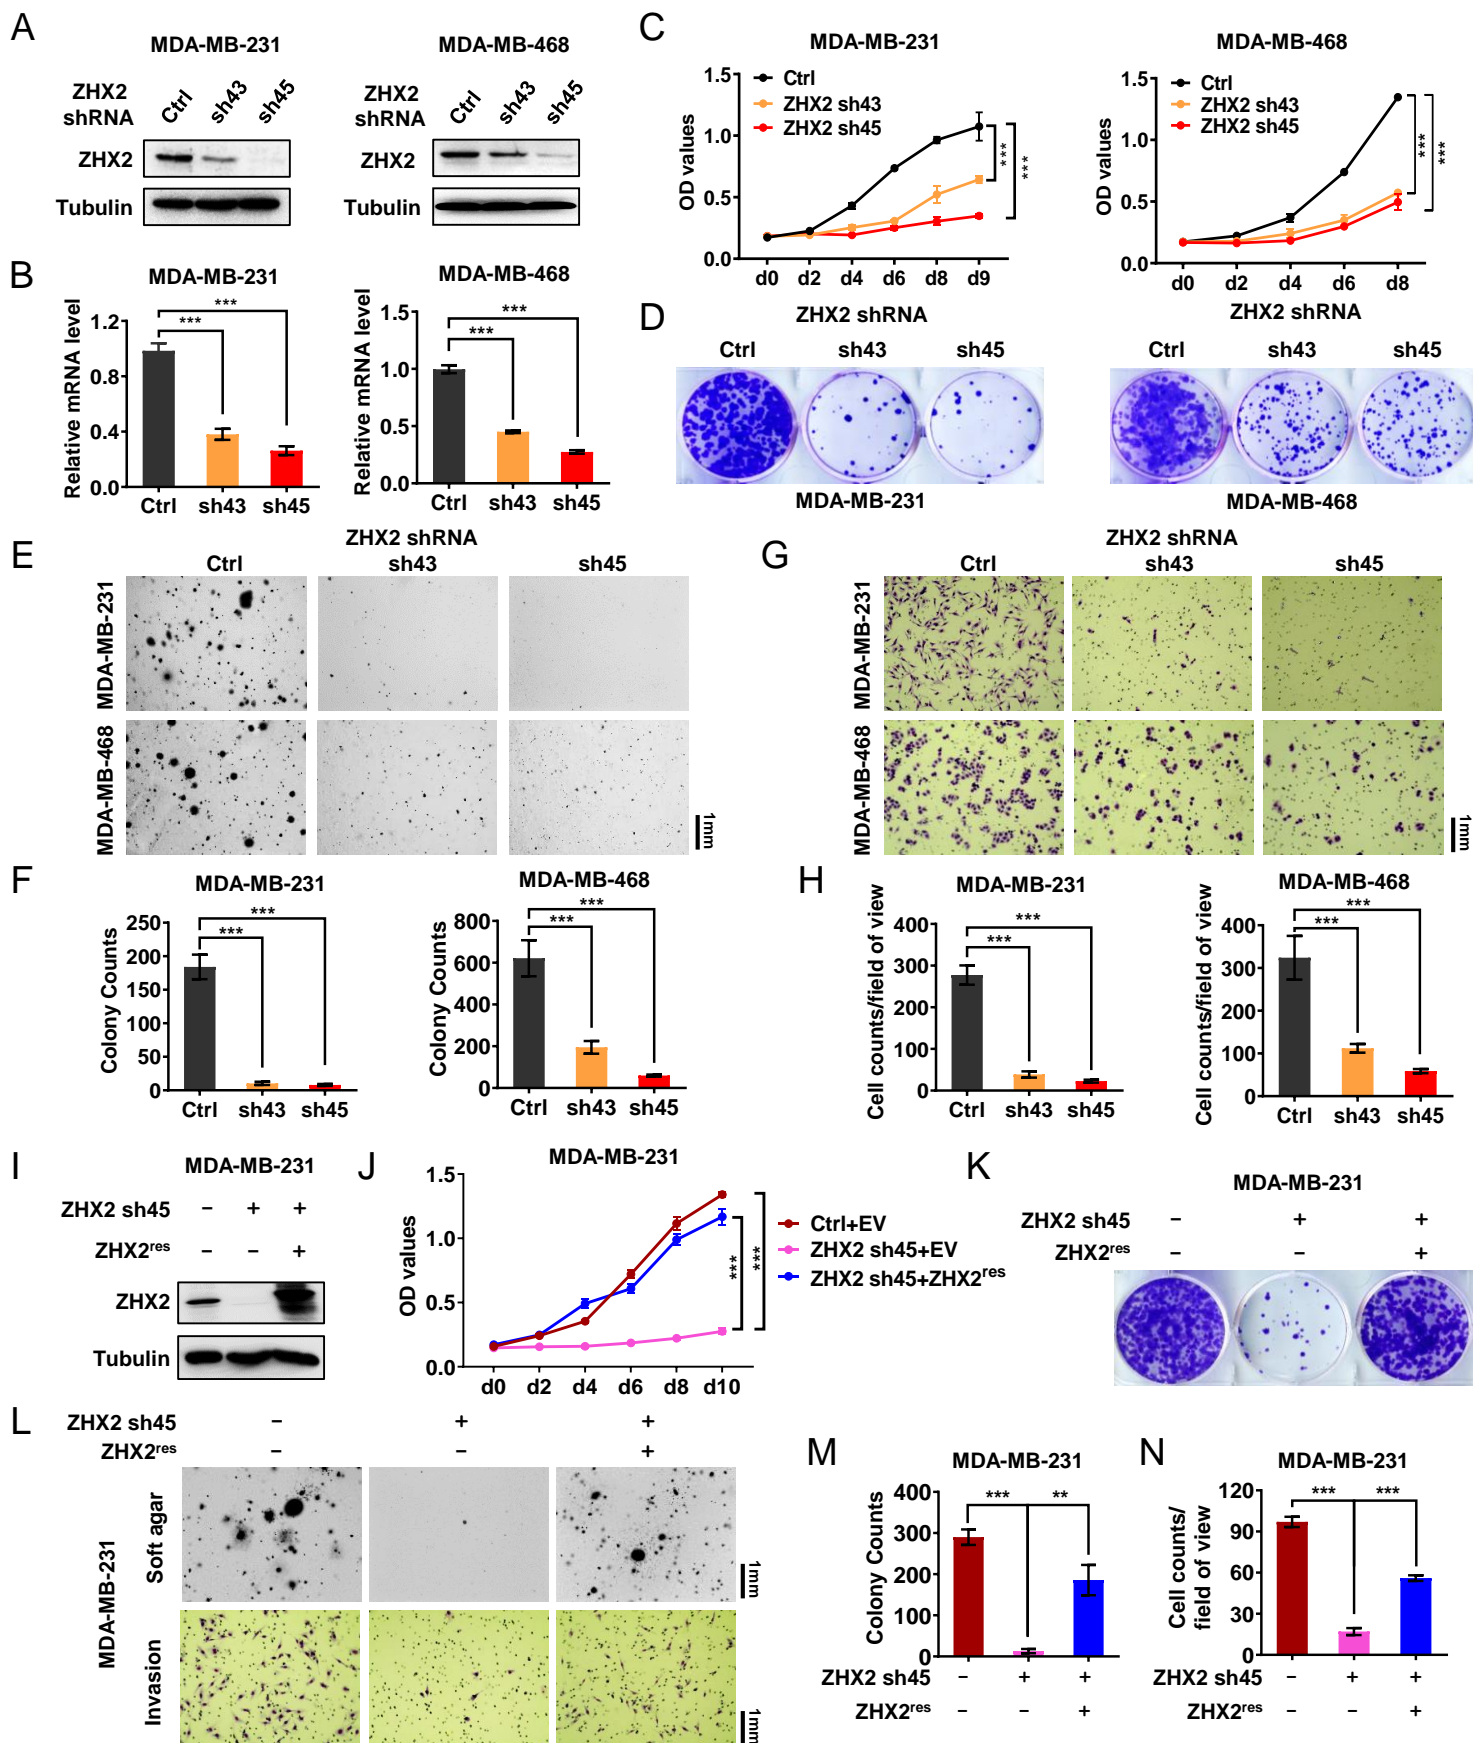

# Figure 3

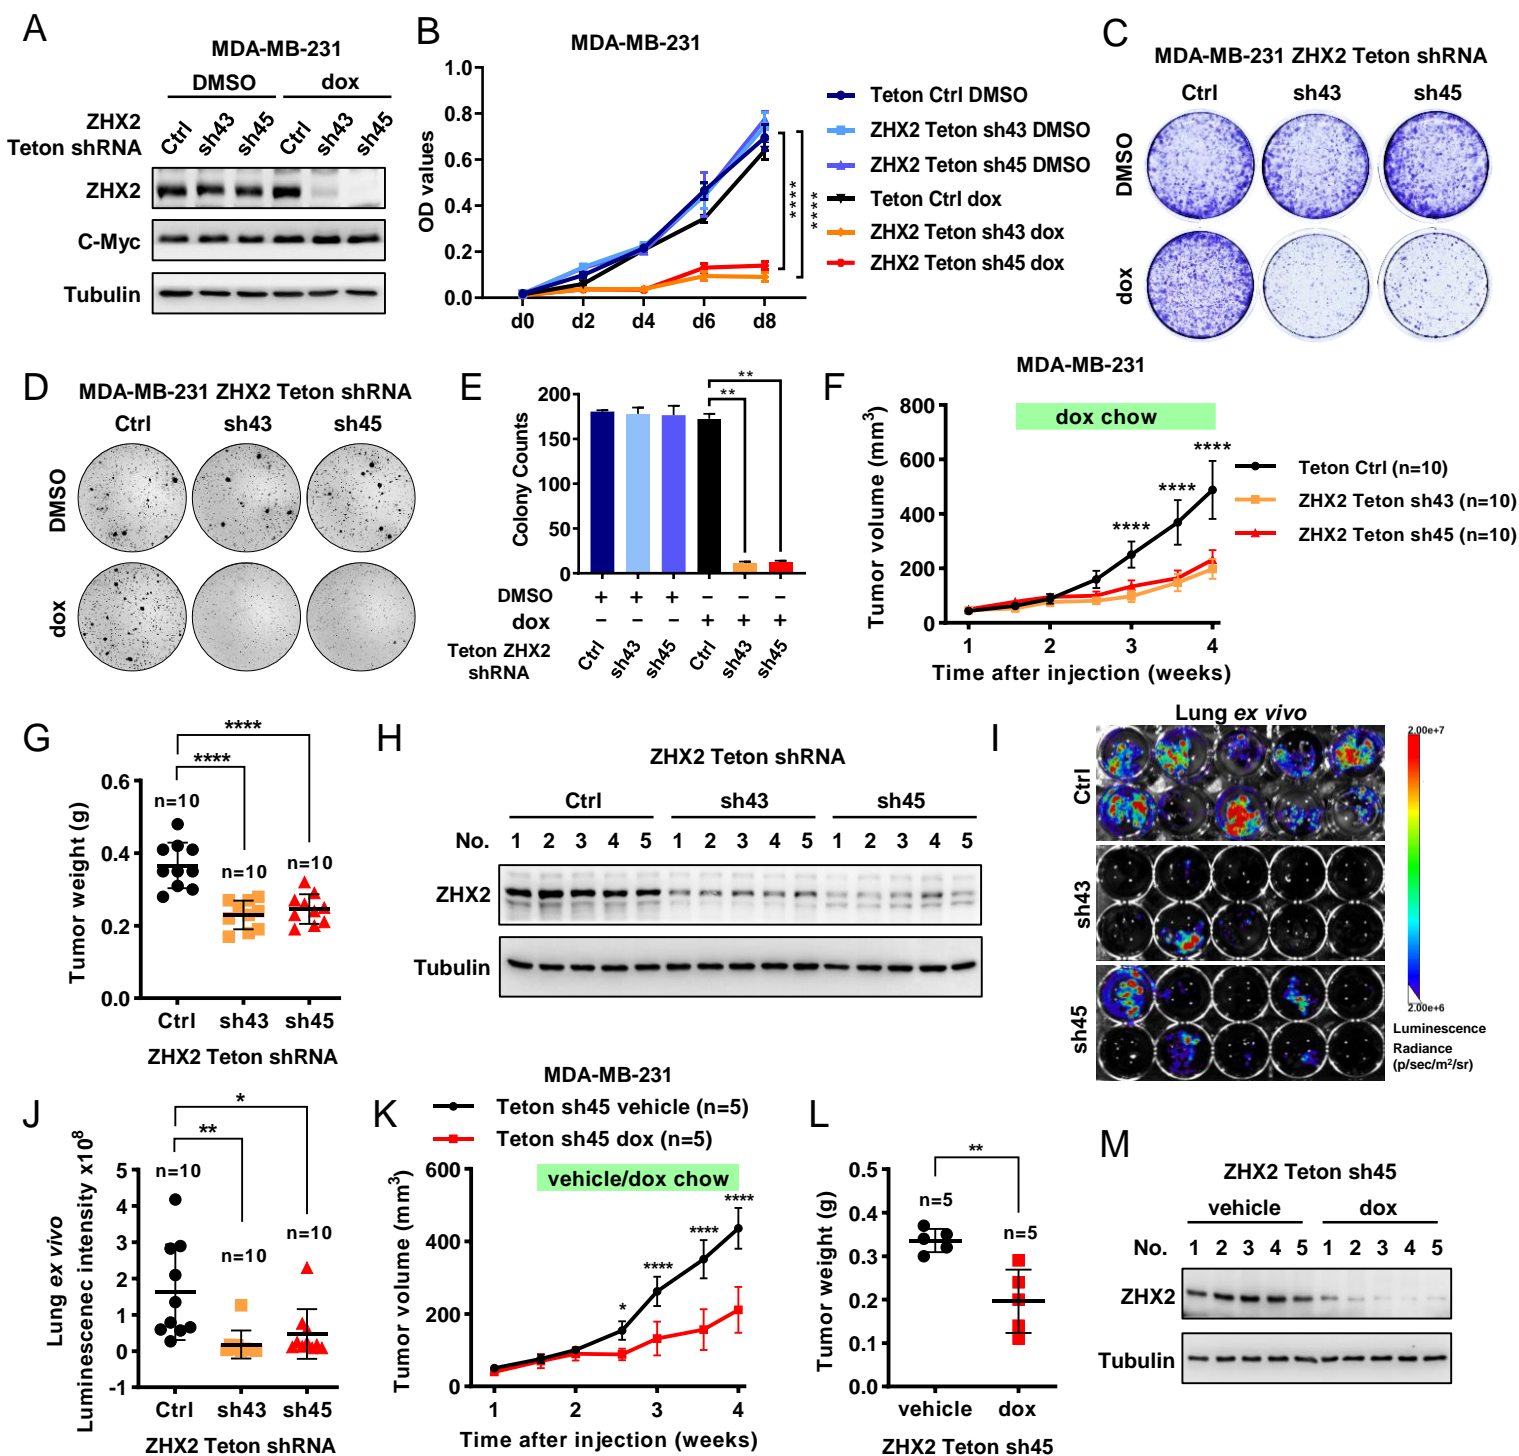

# Figure 4

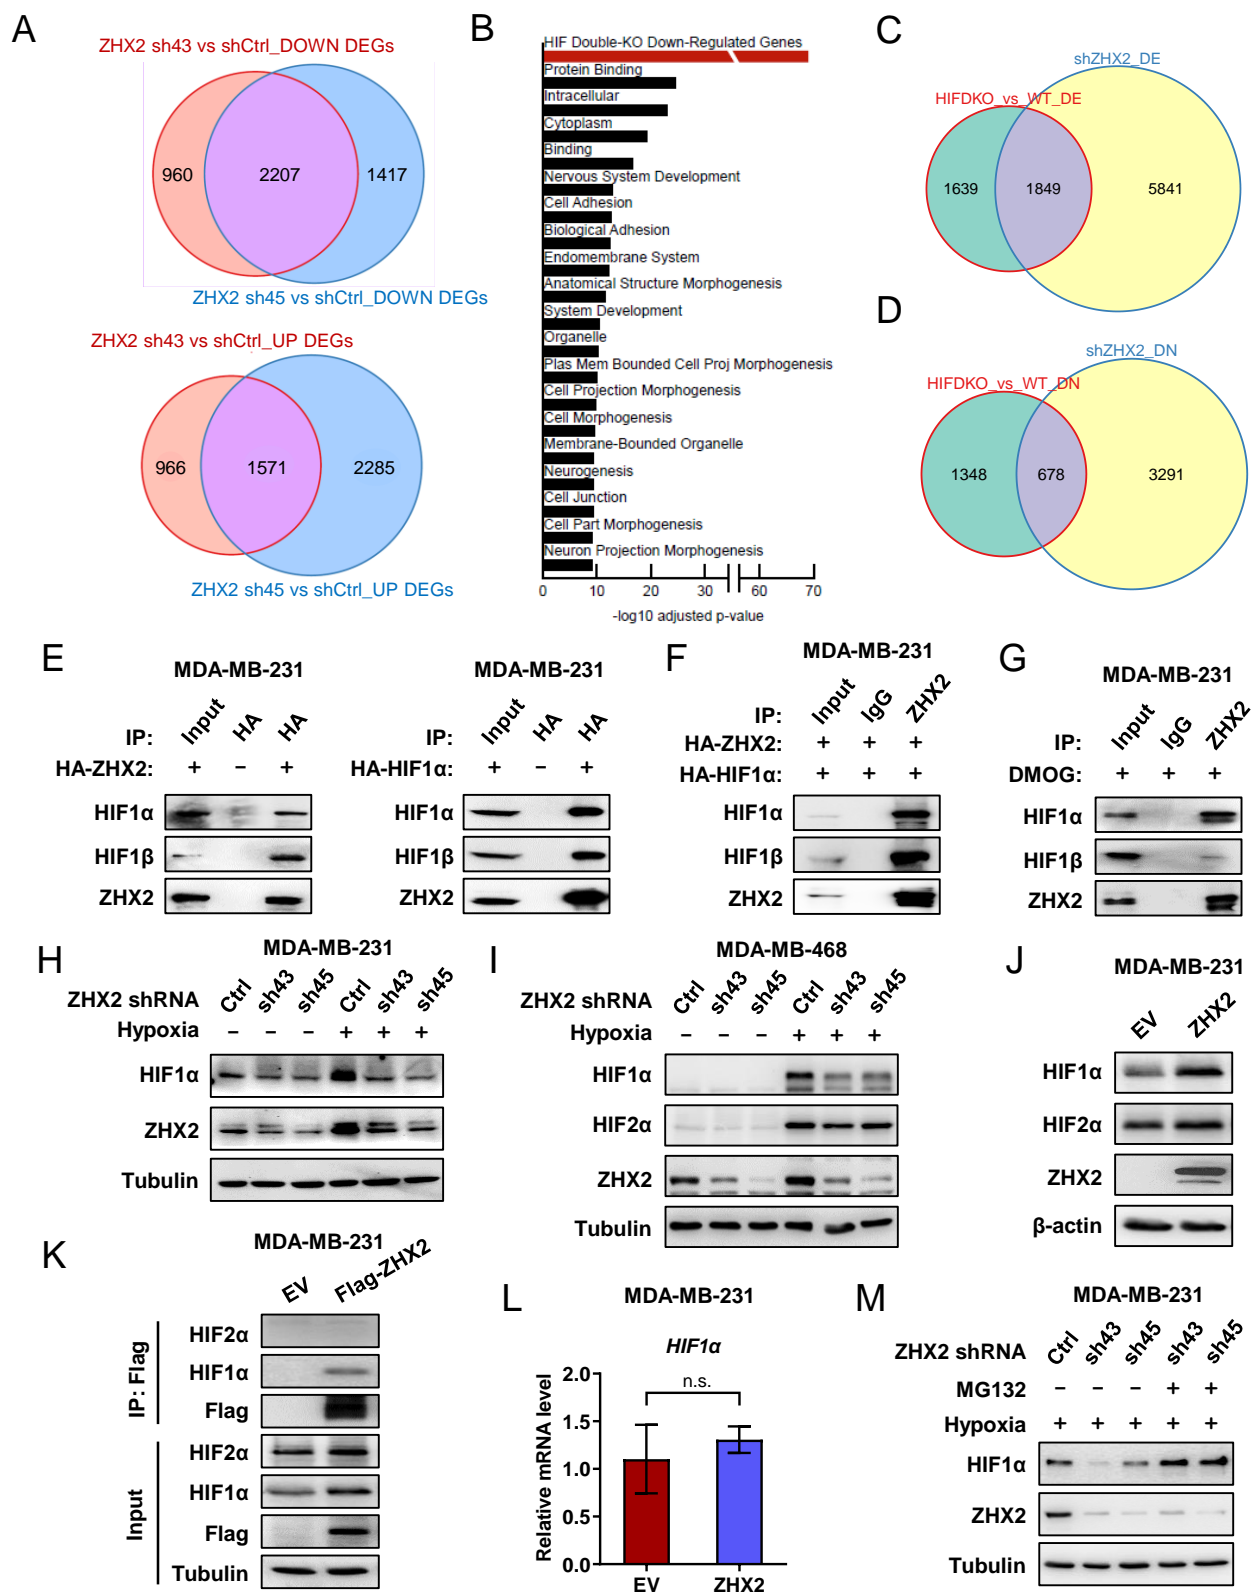

# Figure 5

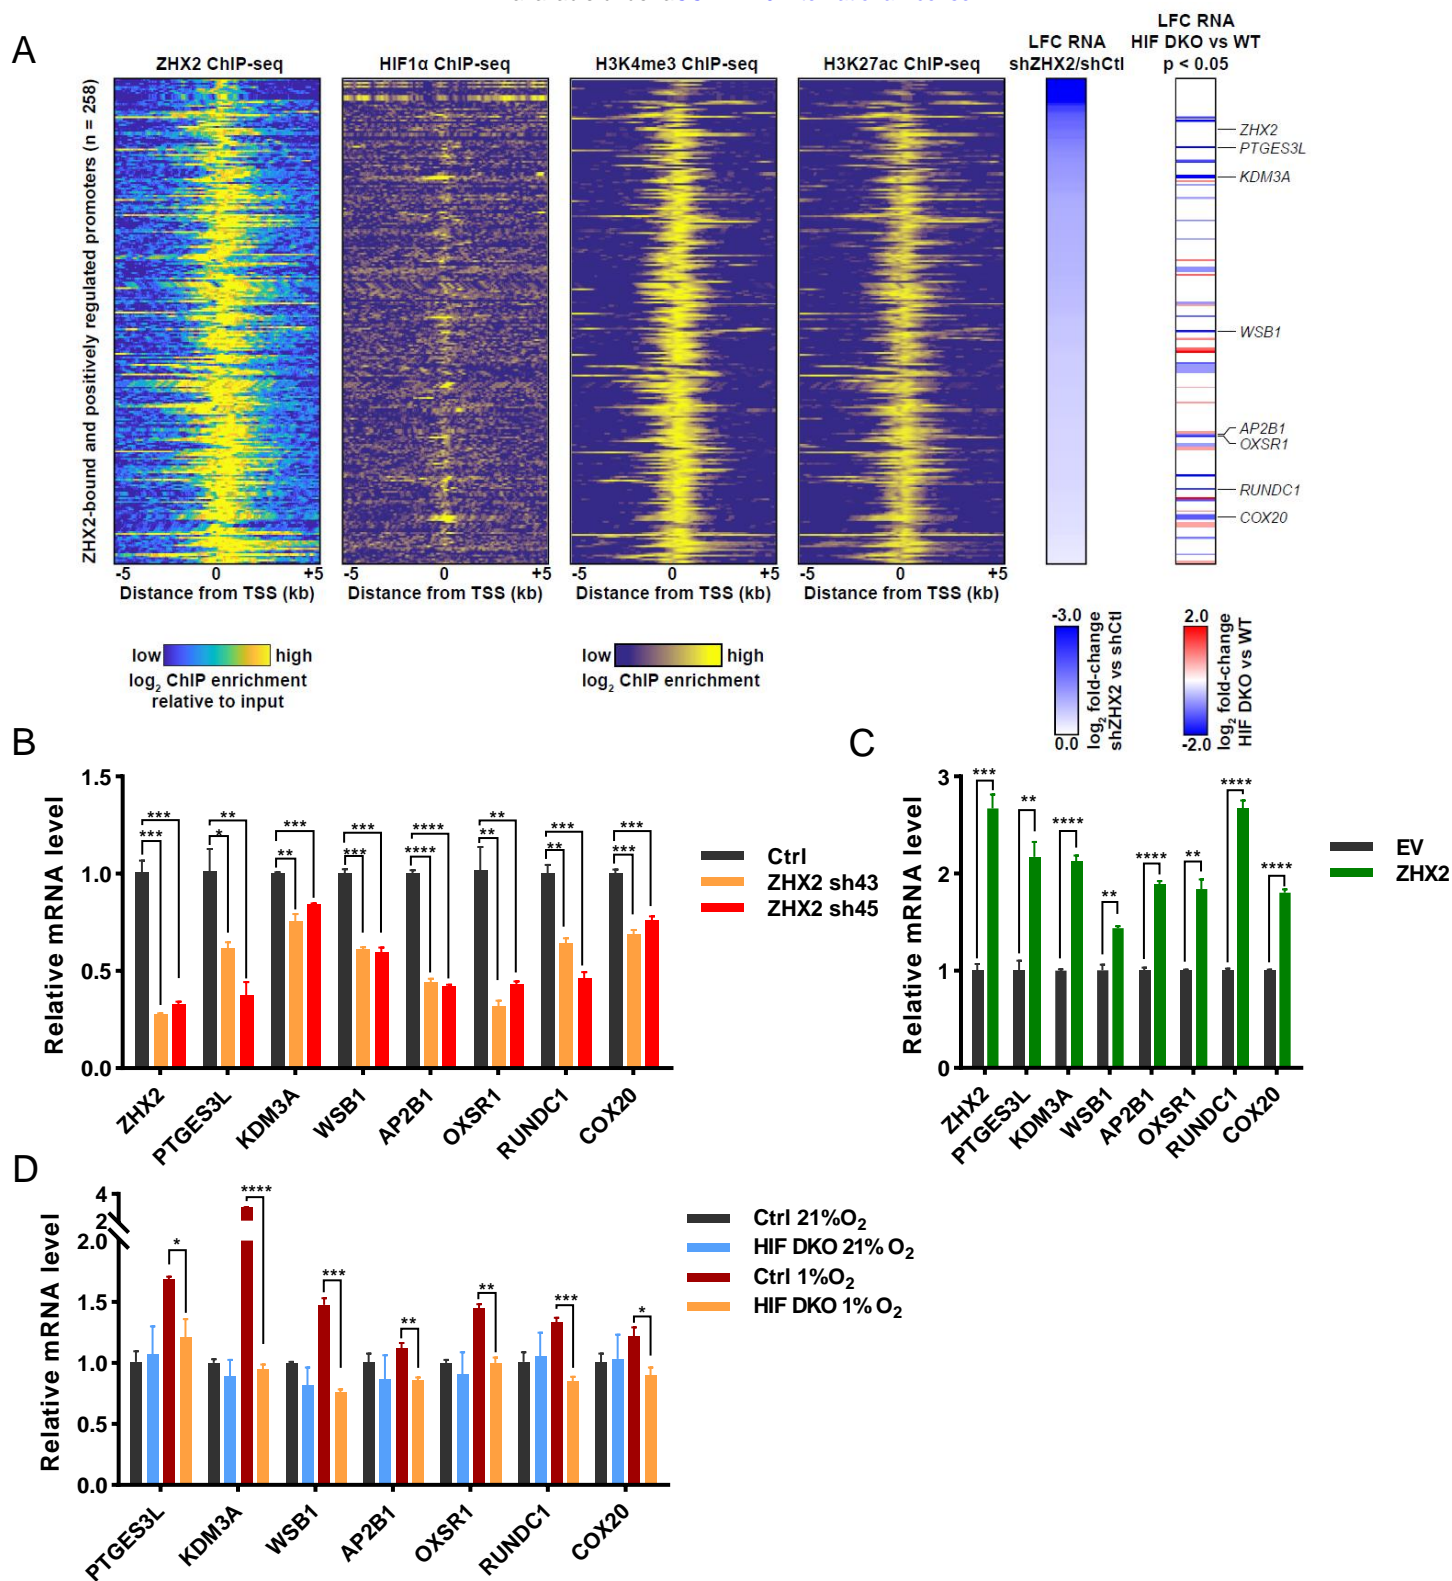



## Figure 6

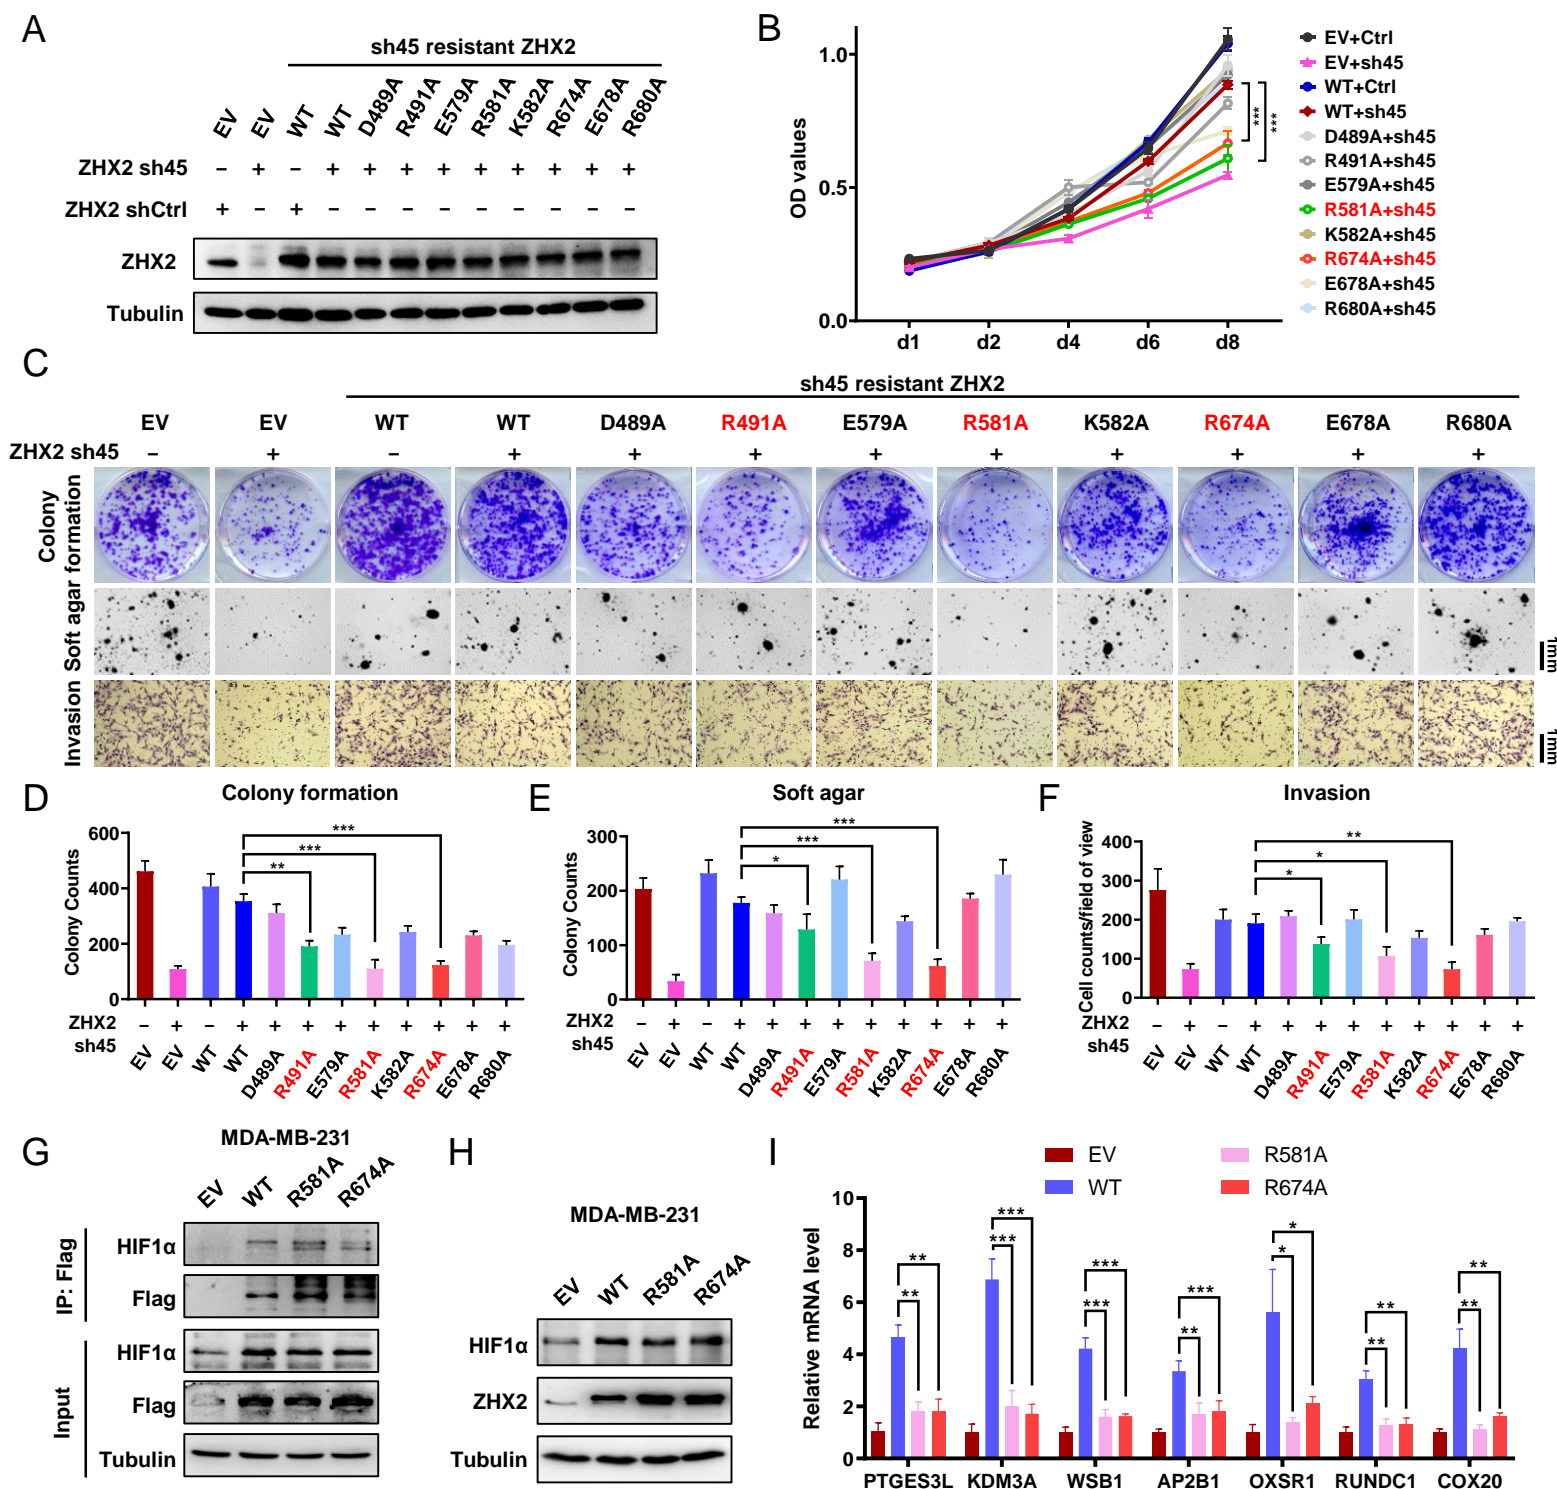

## 1 **Supplemental Methods**

2 **Survival analysis.** The K-M plots were got from <https://kmplot.com>(9). We chose TNBC  
3 patients as follow: ER status-IHC: ER negative, ER status-array: ER negative, PR status-IHC:  
4 PR negative, HER2 status-array: HER2 negative. Finally, 153 TNBC patients were included in  
5 the overall survival (OS) analysis. ZHX2 overexpression were chosen as upper tertile  
6 expression.

7  
8 **Luciferase reporter assay.** For HIF transcription assay, sub-confluent MDA-MB-231 cells  
9 (200,000 cells/24-well plate) were transiently transfected with 30 ng pCMV-Renilla and 100 ng of  
10 HRE-Luci reporter. Forty-eight hours after transfection, luciferase assays were performed by  
11 Dual-Luciferase® Reporter Assay System (Promega, E1960). The experiments were repeated  
12 in triplicate with similar results.

13  
14 **DNA-protein contact analysis from structural bioinformatics data.** Sequences in the apo-  
15 form human homeodomains 2,3 and 4 (HD2/3/4) (PDB ID: 3NAU, 2DMP and 3NAR) (Bird et al.,  
16 2010) (Bank, 2020) were BLASTed against the sequences in the Protein Data Bank  
17 (PDB)(Berman et al., 2000). Among the resolved structures, 12, 20 and 15 DNA-bound  
18 complexes with sequence identity higher than 30% (Rost, 1999) for HD2, HD3, and HD4 were  
19 identified. We then carried out the homology-modeling, using SWISS-MODEL (Waterhouse et  
20 al., 2018), to structurally model the HD2/3/4 using their corresponding bound-forms as the  
21 templates, so that their sequences assume the protein structures in the DNA-complexed forms.  
22 For instance, HD2 sequence could therefore adapt 12 different bound-form protein structures.  
23 With this method, we found every HD protein contact the DNA with its last (C-terminal) helix  
24 (Supplemental Figure 5). We then count the number of DNA-protein contacts at the atomic level  
25 for every residue in the C-terminal helix. The top-ranked residues in HD2/3/4, in terms of their

26 DNA contact frequency normalized by the number of bound-forms used, are listed together with  
27 their evolutionary conservation in Supplemental Table 1.

## 28 **MD simulations**

### 29 *Homology Modeling to create DNA-bound HD complexes for simulations*

30 Because there are no experimentally solved DNA-complexed structures for human HD2, 3 and  
31 4, in order to simulate the human HD-DNA interaction, our goal is to find structurally solved  
32 DNA-bound forms whose DNA sequence could have the highest chance to stably interact with  
33 human HD2/3/4. We aimed to ensure the highest likelihood of stable interaction between the  
34 selected DNA and HD2/3/4 as well as to have a fair comparison of binding ability for HD2/3/4  
35 and their DNA-binding residues. To this end, we searched the DNA-bound HD proteins  
36 containing a DNA-binding helical stretch that has the highest sequence identity with the C-  
37 terminal helices (the main DNA-binding helix; see Supplemental Figure 1 and Video 1) in HD2,  
38 3 and 4, respectively. Among the bound-form proteins that have the top 2 highest sequence  
39 homology in the C-terminal helices with those in human HD2/3/4, by homology modeling using  
40 SWISS-MODEL (Waterhouse et al., 2018), a NMR-resolved structural ensemble of VND/NK-2  
41 homeodomain-DNA complex (PDB ID: 1NK2, where the first model is taken) (Gruschus, Tsao,  
42 Wang, Nirenberg, & Ferretti, 1997) was chosen to build the DNA-bound form of HD2, an X-ray  
43 resolved structure of Yeast MAT $\alpha$ 2 homeodomain/MCM1 transcription factor/DNA complex  
44 (PDB ID: 1MNM;) (Tan & Richmond, 1998) was chosen to build the DNA-bound form of HD3,  
45 and an X-ray resolved structure of Oct-1 Transcription factor DNA complex (PDB ID:1HF0);  
46 (Remenyi et al., 2001) was chosen to build the DNA-bound form of HD4, respectively. The  
47 homology of C-terminal helices between HD2/3/4 and their corresponding bound-form templates  
48 are 54.55%, 53.85%, and 100% respectively.

### 49 *System Setup and Energy Minimization*

50 Prior to solvation and addition of ions, protonation state and the net charge of HD2/3/4-dsDNA  
51 complexes at pH 7.0 were calculated using PDB2PQR(Dolinsky et al., 2007). The starting

52 structure was prepared using ff14SB (Maier et al., 2015) force-fields for proteins, bsc1 (Ivani et  
53 al., 2016) force fields for the DNA, TIP3P water model, and monovalent ion parameters (Joung  
54 & Cheatham, 2009) through tLeap (Daoudi et al., 2019) from AmberTools18. To neutralize the  
55 charge of each system, 24 Na<sup>+</sup> were added into hb2-dsDNA and hb3-dsDNA complexes and 23  
56 Na<sup>+</sup> were added into hb4-dsDNA complex systems. In addition, 23 Na<sup>+</sup> and 23 Cl<sup>-</sup> ions were  
57 added to each system to reach 100 mM salt concentration. Each system was prepared in a  
58 water box measuring 78Å on all sides.

59 Energy minimization for each of the systems was done in two stages. In the first stage, a  
60 harmonic restraint of 100 kcal/mol/Å<sup>2</sup> was applied on all heavy atoms of both protein and  
61 dsDNA. In the second stage, the harmonic restraints for protein's CA atoms were relaxed to 2  
62 kcal/mol/Å<sup>2</sup> while all the DNA's heavy atoms were still subject to a 100 kcal/mol/Å<sup>2</sup> restraint.

### 63 *Equilibration and Explicit Solvent Production MD Simulations*

64 Each energy-minimized system was gradually heated from 50K to 320K and cooled down to  
65 310K in a canonical (NVT) ensemble, using Langevin thermostat (Pastor, Brooks, & Szabo,  
66 1988) with a collision frequency of 2 ps<sup>-1</sup>, for 25 ps while applying harmonic restraints of 10  
67 kcal/mol/Å<sup>2</sup> on dsDNA's C2, C4', and P atoms and 2 kcal/mol/Å<sup>2</sup> on protein's CA atoms. Each of  
68 the systems was equilibrated first in a canonical ensemble at 310K for 15 ns. This was followed  
69 by an isothermal-isobaric ensemble for 20 ns at 310K applying harmonic restraints of 2  
70 kcal/mol/Å<sup>2</sup> on dsDNA's C2, C4', and P atoms and 1 kcal/mol/Å<sup>2</sup> on protein's CA atoms. Further  
71 equilibration isothermal-isobaric ensemble (NPT), where a constant pressure was maintained by  
72 Berendsen barostat (H. J. C. Berendsen, 1998) at 1 atm and 310K, was done for 40 ns, while  
73 harmonic restraints of 2 kcal/mol/Å<sup>2</sup> on dsDNA's C2, C4', and P atoms and 0.1 kcal/mol/Å<sup>2</sup> on  
74 protein's CA atoms were applied. This was followed by a 350 ns production run at 2 fs time step  
75 applying the SHAKE constraint algorithm (Hopkins, Le Grand, Walker, & Roitberg, 2015) to  
76 hydrogen atoms in isothermal-isobaric ensemble at 310K and 1 atm. All the simulations were  
77 carried out by the AMBER18 software package (Daoudi et al., 2019) with long-range

78 electrostatic forces being calculated using Particle Mesh Ewald method (Tom Darden, 1993) at  
79 a 10Å cutoff distance.

80

81 **Legend for Figure-source data**

82 **Figure 1-source data.** Uncropped western blot images for Figure 1.

83 **Figure 2-source data.** Uncropped western blot images for Figure 2.

84 **Figure 3-source data.** Uncropped western blot images for Figure 3.

85 **Figure 4-source data.** Uncropped western blot images for Figure 4.

86 **Figure 6-source data.** Uncropped western blot images for Figure 6.

87 **Figure supplement 1-source data.** Uncropped western blot images for Figure supplement 1.

88 **Figure supplement 2-source data.** Uncropped western blot images for Figure supplement 2.

89 **Figure supplement 3-source data.** Uncropped western blot images for Figure supplement 3.

90 **Figure supplement 4-source data.** Uncropped western blot images for Figure supplement 4.

91

92

93

## 94 Supplemental Reference

- 95 Bank, R. (2020). RCSB PDB - 2DMP: Solution structure of the third homeobox domain of Zinc  
96 fingers and homeoboxes protein 2. . *Rcsb.org*. Retrieved from  
97 <https://www.rcsb.org/structure/2dmp>
- 98 Berman, H. M., Westbrook, J., Feng, Z., Gilliland, G., Bhat, T. N., Weissig, H., . . . Bourne, P. E.  
99 (2000). The Protein Data Bank. *Nucleic Acids Res*, *28*(1), 235-242.  
100 doi:10.1093/nar/28.1.235
- 101 Bird, L. E., Ren, J., Nettleship, J. E., Folkers, G. E., Owens, R. J., & Stammers, D. K. (2010).  
102 Novel structural features in two ZHX homeodomains derived from a systematic study of  
103 single and multiple domains. *BMC Struct Biol*, *10*, 13. doi:10.1186/1472-6807-10-13
- 104 Daoudi, S., Semmeq, A., Badawi, M., Assfeld, X., Arfaoui, Y., & Pastore, M. (2019). Electronic  
105 structure and optical properties of isolated and TiO<sub>2</sub>-grafted free base porphyrins for  
106 water oxidation: A challenging test case for DFT and TD-DFT. *J Comput Chem*, *40*(29),  
107 2530-2538. doi:10.1002/jcc.26027
- 108 Dolinsky, T. J., Czodrowski, P., Li, H., Nielsen, J. E., Jensen, J. H., Klebe, G., & Baker, N. A.  
109 (2007). PDB2PQR: expanding and upgrading automated preparation of biomolecular  
110 structures for molecular simulations. *Nucleic Acids Res*, *35*(Web Server issue), W522-  
111 525. doi:10.1093/nar/gkm276
- 112 Gruschus, J. M., Tsao, D. H., Wang, L. H., Nirenberg, M., & Ferretti, J. A. (1997). Interactions of  
113 the vnd/NK-2 homeodomain with DNA by nuclear magnetic resonance spectroscopy:  
114 basis of binding specificity. *Biochemistry*, *36*(18), 5372-5380. doi:10.1021/bi9620060
- 115 H. J. C. Berendsen, J. P. M. P., W. F. van Gunsteren, A. DiNola, and J. R. Haak. (1998).  
116 Molecular dynamics with coupling to an external bath. *The Journal of Chemical Physics*,  
117 *81*(8).
- 118 Hopkins, C. W., Le Grand, S., Walker, R. C., & Roitberg, A. E. (2015). Long-Time-Step  
119 Molecular Dynamics through Hydrogen Mass Repartitioning. *J Chem Theory Comput*,  
120 *11*(4), 1864-1874. doi:10.1021/ct5010406
- 121 Ivani, I., Dans, P. D., Noy, A., Perez, A., Faustino, I., Hospital, A., . . . Orozco, M. (2016).  
122 Parmbsc1: a refined force field for DNA simulations. *Nat Methods*, *13*(1), 55-58.  
123 doi:10.1038/nmeth.3658
- 124 Joung, I. S., & Cheatham, T. E., 3rd. (2009). Molecular dynamics simulations of the dynamic  
125 and energetic properties of alkali and halide ions using water-model-specific ion  
126 parameters. *J Phys Chem B*, *113*(40), 13279-13290. doi:10.1021/jp902584c
- 127 Maier, J. A., Martinez, C., Kasavajhala, K., Wickstrom, L., Hauser, K. E., & Simmerling, C.  
128 (2015). ff14SB: Improving the Accuracy of Protein Side Chain and Backbone  
129 Parameters from ff99SB. *J Chem Theory Comput*, *11*(8), 3696-3713.  
130 doi:10.1021/acs.jctc.5b00255
- 131 Pastor, R. W., Brooks, B. R., & Szabo, A. (1988). An analysis of the accuracy of Langevin and  
132 molecular dynamics algorithms. *Molecular Physics*, *65*(6), 1409-1419.  
133 doi:10.1080/00268978800101881
- 134 Remenyi, A., Tomilin, A., Pohl, E., Lins, K., Philippsen, A., Reinbold, R., . . . Wilmanns, M.  
135 (2001). Differential dimer activities of the transcription factor Oct-1 by DNA-induced  
136 interface swapping. *Mol Cell*, *8*(3), 569-580. doi:10.1016/s1097-2765(01)00336-7
- 137 Rost, B. (1999). Twilight zone of protein sequence alignments. *Protein Eng*, *12*(2), 85-94.  
138 doi:10.1093/protein/12.2.85
- 139 Tan, S., & Richmond, T. J. (1998). Crystal structure of the yeast MAT $\alpha$ 2/MCM1/DNA  
140 ternary complex. *Nature*, *391*(6668), 660-666. doi:10.1038/35563
- 141 Tom Darden, D. Y., Lee Pedersen. (1993). Particle mesh Ewald: An N-log(N) method for Ewald  
142 sums in large systems *The Journal of Chemical Physics* *98*(12), 4.

143 Waterhouse, A., Bertoni, M., Bienert, S., Studer, G., Tauriello, G., Gumienny, R., . . . Schwede,  
144 T. (2018). SWISS-MODEL: homology modelling of protein structures and complexes.  
145 *Nucleic Acids Res*, 46(W1), W296-w303. doi:10.1093/nar/gky427  
146

147

## Supplemental Figures

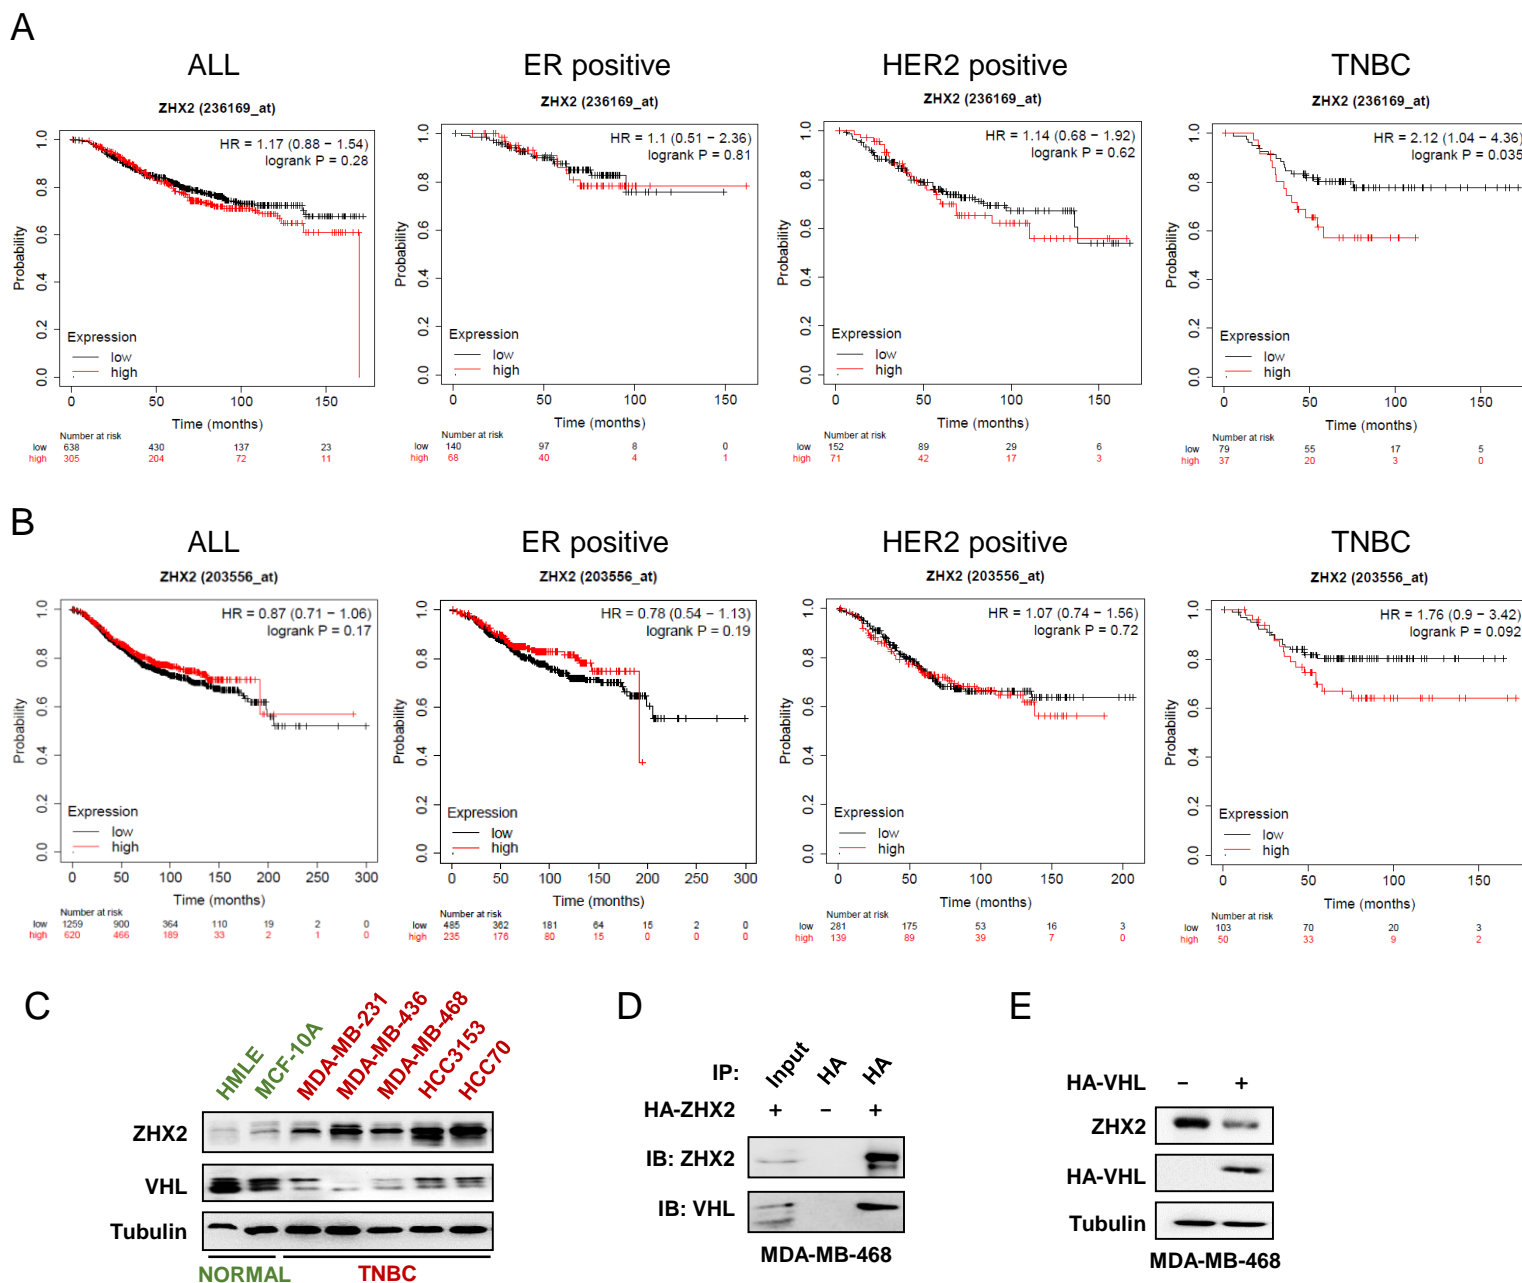

**Figure S1. ZHX2 overexpression leads worse survival and is potentially regulated by pVHL in breast cancer. (A-B)** The overall survival of breast cancer patients with high or low ZHX2 expression in different breast cancer subtypes. The K-M plots were generated from <https://kmplot.com> using two Affymetrix probe, ZHX2: 236169\_at (**A**) and 203556\_at (**B**). (**C**) Immunoblots of lysates from normal breast epithelial cell and TNBC cell lines. (**D**) Immunoprecipitations of MDA-MB-468 cells expressing either control vector or HA-ZHX2. (**E**) Immunoblots of lysates from MDA-MB-468 cells infected with either control vector or HA-VHL.



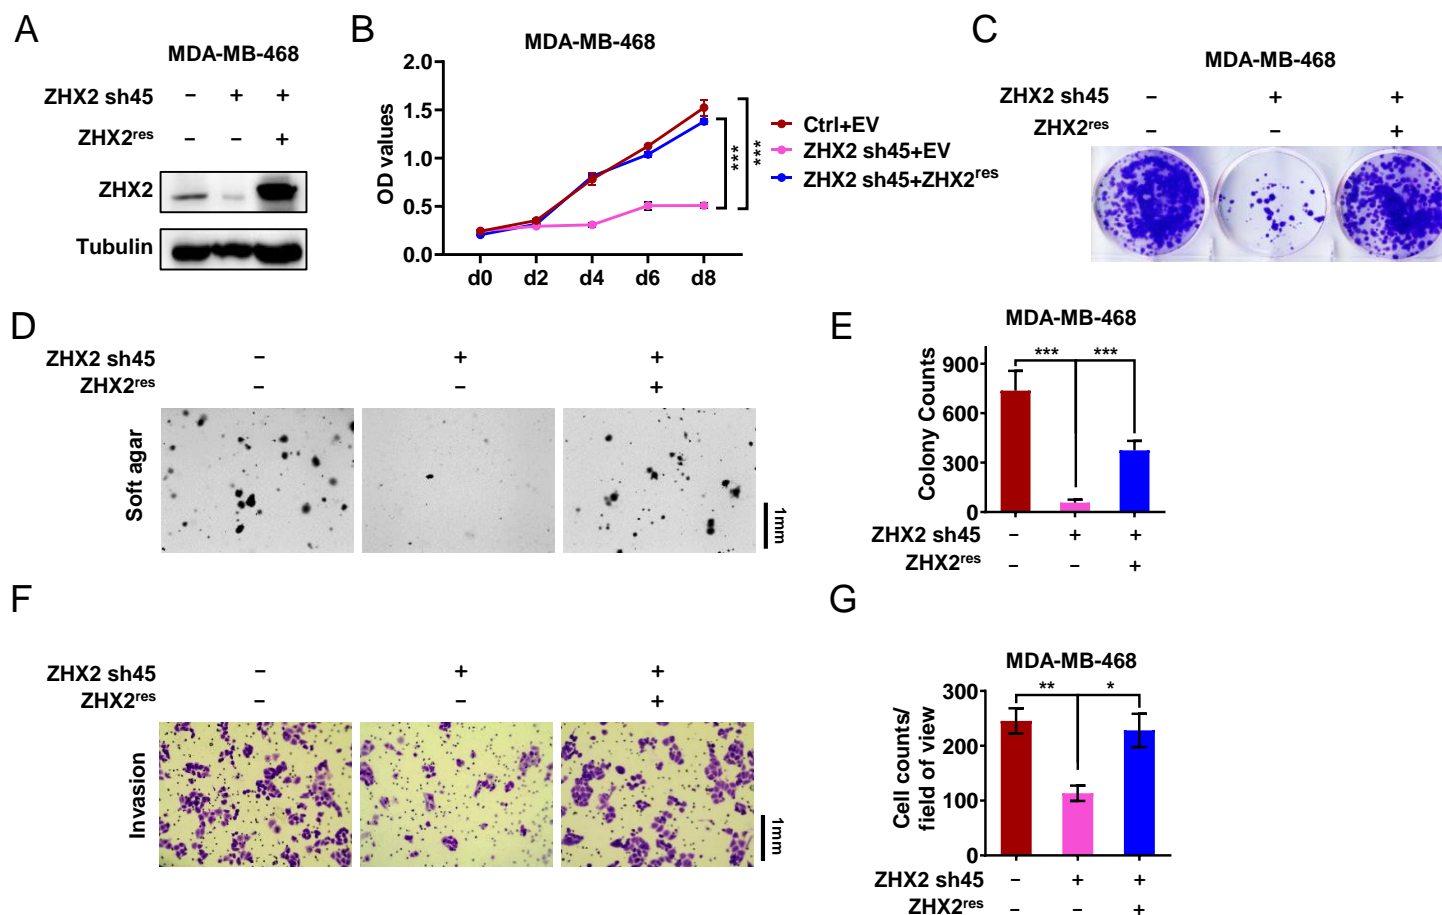

**Figure S2. The phenotype of ZHX2 shRNA on cell proliferation and invasion is due to its on-target effect.** (A) Immunoblot of cell lysates of MDA-MB-468 cells transfected with ZHX2 sh45-resistant ZHX2 (ZHX2<sup>res</sup>) or empty (EV) vector, followed by ZHX2 sh45 or control (Ctrl) shRNA infection. (B) Cell proliferation assays of MDA-MB-468 cells transfected with sh45-resistant ZHX2 (ZHX2<sup>res</sup>) or empty (EV) vector, followed by ZHX2 sh45 or control (Ctrl) shRNA infection. (C) 2-D colony formation assay of MDA-MB-468 cells transfected with sh45-resistant ZHX2 (ZHX2<sup>res</sup>) or empty (EV) vector, followed by ZHX2 sh45 or control (Ctrl) shRNA infection. (D-E) Representative soft agar colony (D) and quantification (E) of MDA-MB-468 cells transfected with ZHX2 sh45-resistant ZHX2 (ZHX2<sup>res</sup>) or empty (EV) vector, followed by ZHX2 sh45 or control (Ctrl) shRNA infection. (F-G) Invasion assays (F) and quantification (G) of MDA-MB-468 cells transfected with ZHX2 sh45-resistant ZHX2 (ZHX2<sup>res</sup>) or empty (EV) vector, followed by ZHX2 sh45 or control (Ctrl) shRNA infection.

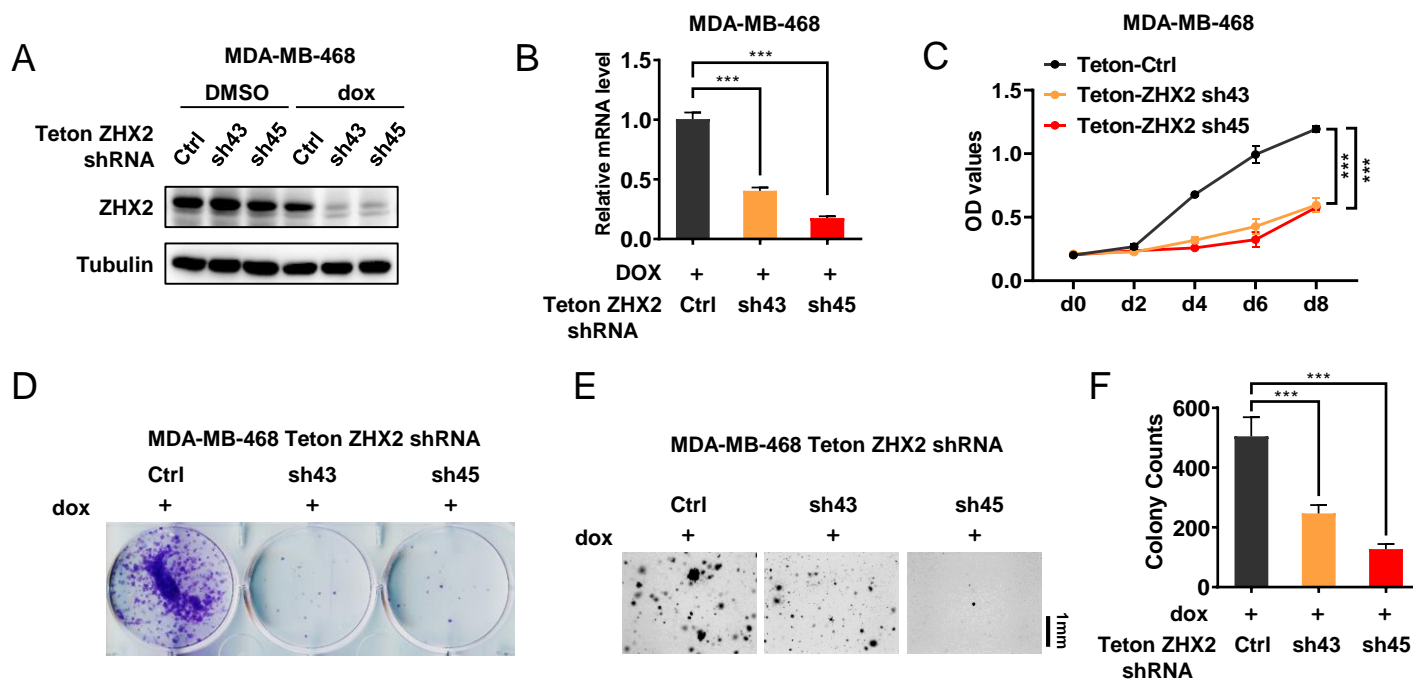

**Figure S3. ZHX2 is important for maintaining TNBC tumorigenesis *in vivo*.** (A-B) Immunoblot (A) and qRT-PCR (B) of MDA-MB-468 cells infected with lentivirus encoding either Teton-ZHX2 shRNA (43, 45) or Teton-Ctrl. (C-D) Cell proliferation assay (C) and 2-D colony formation assay (D) of MDA-MB-468 cells infected with lentivirus encoding either Teton-ZHX2 shRNA (43, 45) or Teton-Ctrl. (E-F) Representative soft agar colony (E) and quantification (F) of MDA-MB-468 cell lines infected with lentivirus encoding either Teton-ZHX2 shRNA (43, 45) or Teton-Ctrl.

| NAME                                       | SIZE | ES         | NES       | NOM p-val   | FDR q-val   | FWER p-val | RANK AT MAX |
|--------------------------------------------|------|------------|-----------|-------------|-------------|------------|-------------|
| <b>HALLMARK_HYPOXIA</b>                    | 58   | 0.5568272  | 2.5719726 | 0           | 0           | 0          | 912         |
| HALLMARK_KRAS_SIGNALING_UP                 | 78   | 0.44155815 | 2.154921  | 0           | 8.73E-04    | 0.002      | 697         |
| HALLMARK_EPITHELIAL_MESENCHYMAL_TRANSITION | 64   | 0.44942394 | 2.132924  | 0           | 0.001757428 | 0.006      | 937         |
| HALLMARK_APICAL_JUNCTION                   | 46   | 0.46112463 | 2.0707603 | 0           | 0.002172801 | 0.01       | 402         |
| HALLMARK_UV_RESPONSE_DN                    | 32   | 0.46017453 | 1.884963  | 0.001248439 | 0.008784941 | 0.05       | 627         |
| HALLMARK_TNFA_SIGNALING_VIA_NFKB           | 64   | 0.39964557 | 1.8777542 | 0           | 0.007865197 | 0.054      | 1049        |
| HALLMARK_COAGULATION                       | 42   | 0.42355058 | 1.8189241 | 0.002375297 | 0.013317258 | 0.101      | 701         |
| HALLMARK_COMPLEMENT                        | 58   | 0.38593316 | 1.7986828 | 0.004581902 | 0.014482699 | 0.122      | 701         |
| HALLMARK_ALLOGRAFT_REJECTION               | 47   | 0.35706216 | 1.5930052 | 0.02183908  | 0.06974829  | 0.513      | 976         |
| HALLMARK_GLYCOLYSIS                        | 48   | 0.33867225 | 1.5142627 | 0.048292108 | 0.108907565 | 0.722      | 957         |

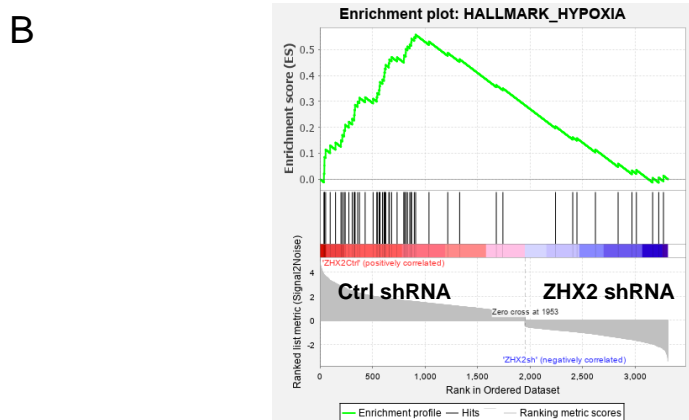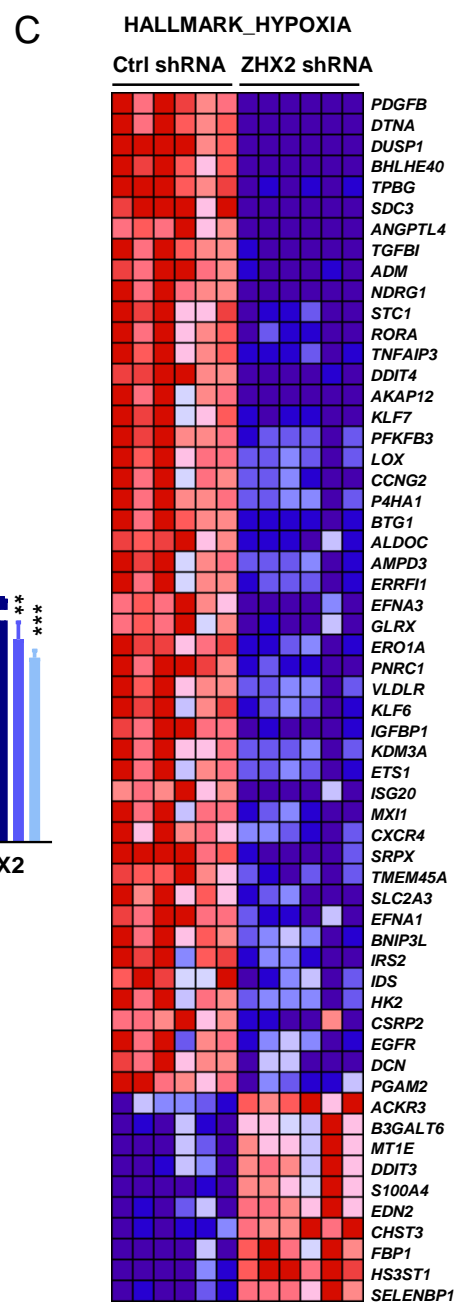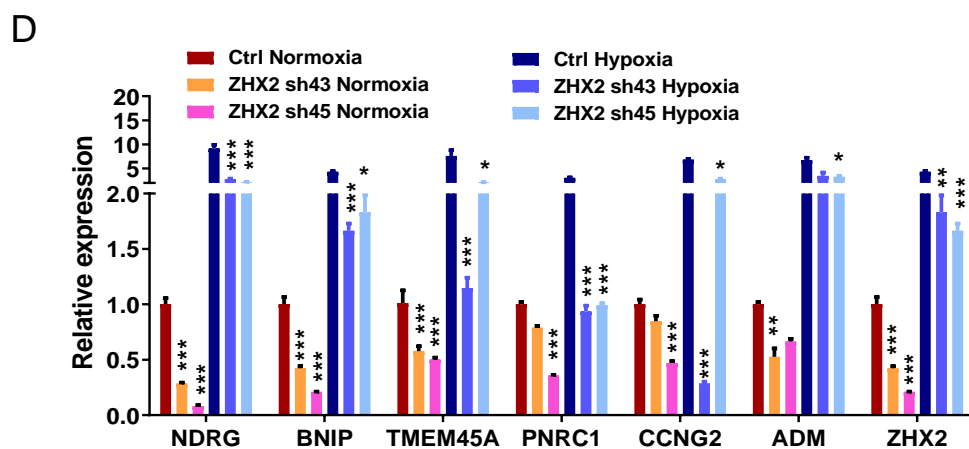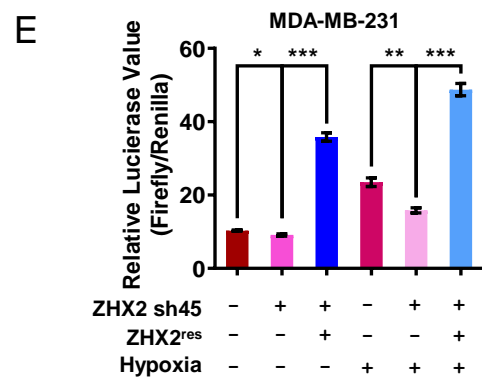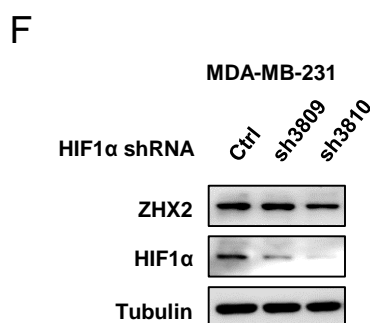

**Figure S4. ZHX2 regulates HIF1 signaling in TNBC.** (A) Gene set enrichment analysis (GSEA) of the significantly decreased pathways in ZHX2 depleted MDA-MB-231 cells. (B-C) GSEA plot (B) and gene set heatmap (C) suggest hypoxia pathway is significantly downregulated in ZHX2 depleted MDA-MB-231 cells. (D) qRT-PCR quantification of relative mRNA expression of hypoxia target genes from MDA-MB-231 cells infected with ZHX2 shRNA 43, 45 or Ctrl under normoxia or hypoxia conditions. (E) HRE double luciferase gene assay of MDA-MB-231 cells infected with ZHX2 sh45, sh45-resistant ZHX2 (ZHX2<sup>res</sup>) or Ctrl under normoxia or hypoxia condition. (F) Immunoblot of MDA-MB 231 cells infected with lentivirus encoding either HIF1 $\alpha$  shRNA 3809, 3810 or Ctrl.

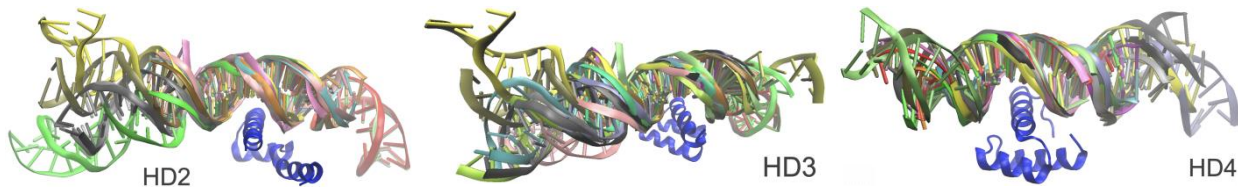

**Figure S5. Residue-based DNA contact analysis derived from ensembles of DNA-bound HD proteins.**

## Supplemental Tables

**Table S1. Amplification status of ZHX2 in different breast cancer subtype.**

| Dataset                                                           | Breast cancer patients |        |          |            | TNBC patients |        |          |            | ER positive |        |          |            | HER2 positive |        |          |            |
|-------------------------------------------------------------------|------------------------|--------|----------|------------|---------------|--------|----------|------------|-------------|--------|----------|------------|---------------|--------|----------|------------|
|                                                                   | Patient                | Sample | ZHX2 Amp | Percentage | Patient       | Sample | ZHX2 Amp | Percentage | Patient     | Sample | ZHX2 Amp | Percentage | Patient       | Sample | ZHX2 Amp | Percentage |
| Breast Cancer (METABRIC, Nature 2012 & Nat Commun 2016)           | 2509                   | 2509   | 512      | 23.6       | 320           | 320    | 104      | 32.5       | 1825        | 1825   | 341      | 21.1       | 247           | 247    | 81       | 32.8       |
| The Metastatic Breast Cancer Project (Provisional, February 2020) | 180                    | 237    | 44       | 18.6       | 5             | 6      | 2        | 33.3       | 94          | 126    | 18       | 14.3       | 37            | 44     | 10       | 22.7       |
| Breast Invasive Carcinoma (TCGA, Cell 2015)                       | 817                    | 818    | 148      | 18.1       | 83            | 83     | 25       | 30.1       | 601         | 601    | 90       | 15.0       | 121           | 121    | 31       | 25.6       |
| Breast Invasive Carcinoma (TCGA, Firehose Legacy)                 | 1101                   | 1108   | 197      | 18.2       | 116           | 117    | 36       | 32.1       | 808         | 814    | 120      | 15.1       | 164           | 164    | 39       | 24.1       |
| Breast Invasive Carcinoma (TCGA, Nature 2012)                     | 825                    | 825    | 92       | 11.8       | 123           | 123    | 23       | 19.3       | 601         | 601    | 58       | 10.3       | 114           | 114    | 20       | 18.2       |

**Table S2. Top DNA-contacting residues in HD2/3/4 along with their evolutionary conservation.**

| Homeobox 2     |                     |                     | Homeobox 3     |                     |                     | Homeobox 4     |                     |                     |
|----------------|---------------------|---------------------|----------------|---------------------|---------------------|----------------|---------------------|---------------------|
| Residue        | Mean Total Contacts | Conservation Score* | Residue        | Mean Total Contacts | Conservation Score* | Residue        | Mean Total Contacts | Conservation Score* |
| LYS 485        | 52.50               | 5                   | <b>GLU 579</b> | 31.05               | 8                   | <b>ARG 674</b> | 129.20              | 6                   |
| <b>ARG 491</b> | 36.33               | 9                   | <b>ARG 581</b> | 24.80               | 6                   | <b>GLU 678</b> | 58.73               | 8                   |
| PHE 463        | 32.92               | 2                   | SER 575        | 23.20               | 5                   | GLU 671        | 45.80               | 7                   |
| ARG 493        | 25.08               | 5                   | <b>LYS 582</b> | 23.00               | 7                   | <b>ARG 680</b> | 28.33               | 9                   |
| <b>ASP 489</b> | 22.42               | 8                   | PHE 553        | 13.00               | 1                   | LYS 635        | 27.73               | 9                   |
| GLU 482        | 14.25               | 6                   | GLU 572        | 9.55                | 8                   | LYS 684        | 25.13               | 7                   |
| LYS 484        | 11.42               | 7                   | ARG 570        | 9.25                | 7                   | LYS 677        | 23.47               | 7                   |
| TYR 492        | 9.58                | 5                   | TRP 576        | 7.55                | 9                   | TRP 652        | 15.53               | 4                   |
| ARG 480        | 8.67                | 8                   | ASP 585        | 4.70                | 7                   | TRP 675        | 10.13               | 9                   |
| TRP 486        | 7.42                | 9                   | SER 578        | 4.70                | 5                   | CYS 681        | 6.33                | 7                   |

\*obtained using ConSurf server (9 – most conserved, 1 – most diverse); bold-faced residues were chosen for the mutagenesis study on TNBC suppression. DNA-protein contact is defined by heavy atom contact within 4Å, while the same DNA atoms contacted by different protein atoms are considered as separate contacts.

**Table S3. MM/PBSA Calculations of the Free Energy ( $\Delta H$ - $T\Delta S$ ) for Homeobox 2-4 dsDNA complexes.**

|                | $\Delta H$ (kcal/mol) | ( $T\Delta S$ ) (kcal/mol) | $\Delta G$ (kcal/mol)               |
|----------------|-----------------------|----------------------------|-------------------------------------|
| <b>HD2+DNA</b> | -60.25 $\pm$ 0.50     | -48.05 $\pm$ 0.97          | <b>-12.20 <math>\pm</math> 1.09</b> |
| <b>HD3+DNA</b> | -56.93 $\pm$ 0.46     | -45.53 $\pm$ 2.39          | <b>-11.40 <math>\pm</math> 2.43</b> |
| <b>HD4+DNA</b> | -39.00 $\pm$ 0.50     | -31.23 $\pm$ 2.34          | <b>-7.77 <math>\pm</math> 2.39</b>  |



**Table S4. Top C-terminal helix residues in the Homeobox 2-4 contributing the most DNA binding enthalpy.**

| Homeobox 2       |                                       | Homeobox 3       |                                       | Homeobox 4       |                                       |
|------------------|---------------------------------------|------------------|---------------------------------------|------------------|---------------------------------------|
| Residue number** | $\Delta H_{\text{total}}$ (kcal/mol)* | Residue number** | $\Delta H_{\text{total}}$ (kcal/mol)* | Residue number** | $\Delta H_{\text{total}}$ (kcal/mol)* |
| ARG 491          | -8.75 ± 0.17                          | ARG 581          | -12.51 ± 0.15                         | ARG 674          | -6.81 ± 0.12                          |
| ARG 480          | -7.98 ± 0.08                          | ARG 571          | -7.54 ± 0.09                          | LYS 684          | -3.46 ± 0.08                          |
| ARG 493          | -7.41 ± 0.09                          | LYS 582          | -6.98 ± 0.10                          | LYS 677          | -3.18 ± 0.07                          |
| LYS 484          | -6.49 ± 0.08                          | ARG 580          | -4.43 ± 0.02                          | ARG 680          | -2.41 ± 0.01                          |
| LYS 485          | -5.00 ± 0.11                          | ARG 570          | -2.66 ± 0.02                          | ARG 669          | -1.78 ± 0.01                          |
| TYR 492          | -2.88 ± 0.03                          | ARG 584          | -2.24 ± 0.01                          | TRP 675          | -1.45 ± 0.05                          |
| ARG 496          | -2.12 ± 0.11                          | SER 578          | -0.71 ± 0.06                          | LEU 682          | -0.79 ± 0.02                          |
| GLN 495          | -1.86 ± 0.07                          | PHE 577          | -0.35 ± 0.01                          | CYS 681          | -0.36 ± 0.02                          |
| TRP 486          | -0.96 ± 0.06                          | LEU 583          | -0.22 ± 0.00                          | THR 670          | -0.36 ± 0.04                          |
| HID 490          | -0.64 ± 0.01                          |                  |                                       | ASN 679          | -0.24 ± 0.02                          |
| SER 481          | -0.49 ± 0.03                          |                  |                                       |                  |                                       |
| PHE 487          | -0.28 ± 0.01                          |                  |                                       |                  |                                       |
| CYS 494          | -0.21 ± 0.00                          |                  |                                       |                  |                                       |

\*  $\Delta H_{\text{total}}$ : enthalpic binding energy derived from MM/PBSA, \*\*this numbering is based on the Uniprot database where the sequence was obtained, highlighted in blue represents the mutated amino acid in the experimental results

**Table S5. Real-time PCR primers used in this study.**

| <b>Genes</b>   | <b>Forward Primer</b>    | <b>Reverse Primers</b>  |
|----------------|--------------------------|-------------------------|
| <i>β-Actin</i> | AGAAAATCTGGCACACACC      | GGGGTGTGAAGGTCTCAA      |
| <i>ZHX2</i>    | GATCAGATAGCTGGAGTCAGGC   | CACAGCAGTTCTAACAGACTTCC |
| <i>TMEM45A</i> | TCCTCTCCTTCTCGCCACTT     | TGTGTTGGATGGGATCTGGC    |
| <i>PNRC1</i>   | TGTTCCGCGATCTTCTCAGG     | GCTAGGAAGCTTGTGCGCTCA   |
| <i>CCNG2</i>   | AGTGATTCCAGAGTGAGCCTT    | AAGGCACAGATGCCAAACCTA   |
| <i>ALDOC</i>   | CTGCAGCCTCATCTGTTTGC     | CATGGTGACAGCTCCCTGTG    |
| <i>AKAP12</i>  | CGAGCGCGTCTCCTTCATT      | GGGCAAGAGCCAAAAGACG     |
| <i>ADM</i>     | ATGAAGCTGGTTCCCGTAGC     | TCCACGACTTAGAGCCCACT    |
| <i>NDRG1</i>   | CTGCACCTGTTTCATCAATGC    | AGAGAAGTGACGCTGGAACC    |
| <i>BNIP3</i>   | CGCAGACACCACAAGATACCA AC | GCCAGCAAATGAGAGAGCAGC   |
| <i>PTGES3L</i> | GTGTTGAGGACAGCACCGAT     | ACACTGGCTTGGAGTTCACTT   |
| <i>KDM3A</i>   | GTGCTCACGCTCGGAGAAA      | GTGGGAAACAGCTCGAATGGT   |
| <i>WSB1</i>    | GGTGTCAGCTTCAAGAGACAAA   | AGTCAGGAGAGAATGCACAGC   |
| <i>AP2B1</i>   | CTCTTTCCAGACGTAGTGAAGT   | GGAGCGGCTCACAGAGATATT   |
| <i>OXS1</i>    | AGGGACGATTACGAGCTGC      | TCCGTTTGATTGCCACTTTCTC  |
| <i>RUNDC1</i>  | AAGAGGGCAGTTATGACTCGC    | GCTGGGTTGACGATCTGAGC    |
| <i>COX20</i>   | TAGGATCTGTTGTGGCTGGC     | CCAGCATCCCAAAGTCACCA    |
| <i>HIF1α</i>   | TATGAGCCAGAAGAACTTTTAGGC | CACCTCTTTTGGCAAGCATCCTG |

### **Movie S1.**

The 350-ns MD simulation trajectory of 1NK2-based HB2-dsDNA complex. The HB2-dsDNA complex is in secondary structure cartoon representation. The top C-terminal helix residue that most contacts the DNA, which is ARG491, and the DNA atoms within 4Å distance from it are in licorice representation.

### **Movie S2.**

The 350-ns MD simulation trajectory of 1MNM-based HB3-dsDNA complex. The HB3-dsDNA complex is in secondary structure cartoon representation (violet color: HB3's helix; grey color: dsDNA). The top C-terminal helix residue that most contacts the DNA, which is ARG581, and the DNA atoms within 4Å distance from it are in licorice representation.

### **Movie S3.**

The 350-ns MD simulation trajectory of 1HF0-based HB4-dsDNA complex. The HB4-dsDNA complex is in secondary structure cartoon representation (violet color: HB4's helix; grey color: dsDNA). The top C-terminal helix residue that most contacts the DNA, which is ARG674, and the DNA atoms within 4Å distance from it are in licorice representation.
